# Supplementary material
Source: PubMed Central journal article supplement (PMC6119467)
Supplement: NIHMS78181-supplement-Supplementary_information.pdf [file NIHMS78181-supplement-Supplementary_information.pdf]

Supplementary Information for:

**The legacy of 4,500 years of polyculture agroforestry in the eastern Amazon**

S. Yoshi Maezumi<sup>1\*</sup>, Daiana Alves<sup>1</sup>, Mark Robinson<sup>1</sup>, Jonas Gregorio de Souza<sup>1</sup>, Carolina Levis<sup>4,5</sup>, Robert Barnett<sup>2</sup>, Edemar Almeida de Oliveira<sup>6</sup>, Dunia Urrego<sup>2</sup>, Denise Schaan<sup>3</sup>, Jose Iriarte<sup>1</sup>

correspondence to: *s.y.maezumi@exeter.ac.uk*

**Author Affiliations**

<sup>1</sup>*Department of Archaeology, College of Humanities, University of Exeter, Laver Building, North Park Road, Exeter EX4 4QE, United Kingdom*

<sup>2</sup>*Department of Geography, College of Life and Environmental Sciences, University of Exeter, Amory Building, Rennes Drive. Exeter, EX4 4RJ, United Kingdom*

<sup>3</sup>*Department of Anthropology, Federal University of Pará, Belém 66075-110, Brazil*

<sup>4</sup>*Programa de Pós-Graduação em Ecologia, Instituto Nacional de Pesquisas da Amazônia–INPA, Av. André Araújo, 2936, Petrópolis, Manaus, AM, 69067-375, Brazil*

<sup>5</sup>*Forest Ecology and Management Group, Wageningen University & Research, Wageningen, the Netherlands*

<sup>6</sup>*Universidade do Estado de Mato Grosso, Campus of Nova Xavantina, Mato Grosso State, Brazil*

## Supplementary Information

### Contents:

#### Supplementary Tables

Table S1. *Metadata from Map for early arrival of Zea mays*

Table S2. *Lago Caranã Dates*

Table S3. *SPD Dates for local and regional archaeology*

Table S4. *Complete botanical inventory data*

Table S5. *Edible plant classifications used in this study*

Table S6. *Edible and other tree, palm, and herb pollen taxa used in this study*

Table S7. *Edible and other tree and herb phytolith taxa used in this study*

Table S8. *Pollen taxa to family level with edible genus and present in modern botanical inventory.*

Table S9. *Phytolith taxa identified in this study.*

Table S10. *Edible phytolith taxa identified in this study.*

#### Supplementary Discussion (D)

D1. *Riverine high-stand*

D2. *Archaeology*

#### Supplementary Figures

Fig. S1. *Lake Caranã age-model*

Fig. S2. *Lake Caranã geochemistry*

Fig. S3. *Lake Caranã pollen data*

Fig. S4. *Serra do Maguari-1 site map*

Fig. S5. *Serra do Maguari phytolith soil profiles*

Fig. S6. *Map of modern vegetation plots*

Fig. S7. *Relative frequency of modern botanical inventories*

#### Supplementary References

## Supplementary Tables

| Site name      | Latitude | Longitude | presence (cal B.P.) |                                   |
|----------------|----------|-----------|---------------------|-----------------------------------|
| Lake San Pablo | 0.22     | -78.22    | ~4900               | Athens et al. 2016 <sup>1</sup>   |
| Lake Ayauch    | -3.04    | -78.03    | ~6000               | Bush et al. 1989 <sup>2</sup>     |
| Lake Sauce     | -6.7     | -76.21    | ~ 6320              | Bush et al. 2016 <sup>3</sup>     |
| Abeja          | -0.57    | -72.4     | ~ 5500              | Mora et al. 1991 <sup>4</sup>     |
| Huaypo         | -13.4    | -72.13    | ~ 2800              | Mosblech et al. 2012 <sup>5</sup> |
| Lake Gentry    | -12.33   | -68.87    | ~ 3630              | Bush et al. 2007 <sup>6</sup>     |
| Lake Rogaguado | -13      | -65.93    | ~ 6500              | Brugger et al. 2016 <sup>7</sup>  |
| Parmana        | 7.86     | -65.77    | ~1600               | Roosevelt 1980 <sup>8</sup>       |
| Monte Castelo  | -12.55   | -63.09    | ~4310               | Hilbert et al. 2017 <sup>9</sup>  |
| Geral          | -1.64    | -53.59    | ~4030               | Bush et al. 2000 <sup>10</sup>    |

Table S1. Site metadata for Figure 1 documenting the early presence of maize in the Amazon.

| <b>Method</b>     | <b>Depth</b> | <b><sup>210</sup>Pb (Bq kg<sup>-1</sup>)</b> | <b><sup>210</sup>Pb (Bq kg<sup>-1</sup>)</b> | <b>Cal. Age (2σ)</b> |
|-------------------|--------------|----------------------------------------------|----------------------------------------------|----------------------|
|                   | (m)          | (supported)                                  | (excess)                                     | (yrs BP)             |
| <sup>210</sup> Pb | 0.005 ±0.005 | 509.09 ±11.05                                | 421.93 ±11.61                                | -62.9 ±              |
| <sup>210</sup> Pb | 0.015 ±0.005 | 552.61 ±20.50                                | 465.45 ±20.81                                | -60.4 ±              |
| <sup>210</sup> Pb | 0.025 ±0.005 | 657.43 ±23.43                                | 570.27 ±23.70                                | -57.3 ±              |
| <sup>210</sup> Pb | 0.045 ±0.005 | 610.75 ±21.61                                | 523.59 ±21.90                                | -48.2 ±2.7           |
| <sup>210</sup> Pb | 0.065 ±0.005 | 709.05 ±26.33                                | 621.88 ±26.57                                | -36.5 ±4.8           |
| <sup>210</sup> Pb | 0.085 ±0.005 | 384.40 ±14.81                                | 297.24 ±15.23                                | -21.5 ±7.2           |
| <sup>210</sup> Pb | 0.105 ±0.005 | 295.22 ±12.41                                | 208.06 ±12.91                                | -13.1 ±8.9           |
| <sup>210</sup> Pb | 0.125 ±0.005 | 163.75 ±7.11                                 | 76.59 ±7.95                                  | -6.0 ±10.9           |
| <sup>210</sup> Pb | 0.145 ±0.005 | 394.06 ±16.48                                | 306.90 ±16.86                                | 5.6 ±15.4            |
| <sup>210</sup> Pb | 0.165 ±0.005 | 196.66 ±7.83                                 | 109.50 ±8.60                                 | 42.2 ±45.2           |
|                   |              | <b>Lab Code</b>                              | <b><sup>14</sup>C yrs BP</b>                 |                      |
| <sup>14</sup> C   | 0.30 ±0.005  | Beta-469035                                  | 1030 ±30                                     | 941 ±107             |
| <sup>14</sup> C   | 0.60 ±0.005  | Beta-469036                                  | 1130 ±30                                     | 1067 ±105            |
| <sup>14</sup> C   | 0.80 ±0.005  | Beta-469037                                  | 2350 ±30                                     | 2394 ±68             |
| <sup>14</sup> C   | 0.100 ±0.005 | Beta-469038                                  | 1830 ±30                                     | 1752 ±113            |
| <sup>14</sup> C   | 0.115 ±0.005 | Beta-427240                                  | 4340 ±30                                     | 4936 ±91             |
| <sup>14</sup> C   | 0.205 ±0.005 | Beta-424296                                  | 7700 ±40                                     | 8492 ±83             |

Table S2. Lago Caranã Dates used in age-depth model.

| <b>Site name</b>   | <b>14C yr BP</b> | <b>Laboratory number</b> | <b>Reference</b>           |
|--------------------|------------------|--------------------------|----------------------------|
| Porto              | 3830 ± 30        | Beta-388953              | this study                 |
| Lago do Jacaré 1   | 3800 ± 70        | Beta-186952              | Gomes 2011 <sup>11</sup>   |
| Zenóbio            | 3680 ± 50        | Beta-186960              | Gomes 2011                 |
| Lago do Jacaré 1   | 3660 ± 70        | Beta-186955              | Gomes 2011                 |
| Lago do Jacaré 1   | 3660 ± 40        | Beta-186956              | Gomes 2011                 |
| Lago do Jacaré 1   | 3600 ± 70        | Beta-186957              | Gomes 2011                 |
| Porto              | 3530 ± 30        | Beta-388955              | this study                 |
| Lago do Jacaré 1   | 3260 ± 50        | Beta-187492              | Gomes 2011                 |
| Porto              | 3260 ± 30        | Beta-322223              | Alves 2014 <sup>12</sup>   |
| Porto              | 3070 ± 30        | Beta-386143              | this study                 |
| Porto              | 3060 ± 30        | Beta-322221              | Alves 2012                 |
| Porto              | 3050 ± 30        | Beta-386145              | this study                 |
| Porto              | 3030 ± 30        | Beta-388950              | this study                 |
| Porto              | 3030 ± 30        | Beta-388954              | this study                 |
| Aldeia             | 3000 ± 40        | Beta-283902              | Gomes 2011                 |
| Porto              | 2912 ± 56        | WK6836                   | Quinn 2004 <sup>13</sup>   |
| Porto              | 2900 ± 30        | Beta-322219              | Alves 2012                 |
| Água azul          | 2880 ± 30        | Beta-293284              | Martins 2012 <sup>14</sup> |
| Porto              | 2820 ± 30        | Beta-386138              | this study                 |
| Lago do Jacaré 1   | 2740 ± 60        | Beta-186958              | Gomes 2011                 |
| Terra Preta        | 2490 ± 80        | Beta-180713              | Gomes 2011                 |
| Aldeia             | 2370 ± 60        | Beta-248482              | Gomes 2011                 |
| Porto              | 2270 ± 63        | WK6834                   | Quinn 2004                 |
| Serraria Trombetas | 2200 ± 30        | Beta-324198              | Martins 2012               |

|                    |           |             |                             |
|--------------------|-----------|-------------|-----------------------------|
| Aldeia             | 2040 ± 40 | Beta-248485 | Gomes 2011                  |
| Terra Preta        | 1840 ± 50 | Beta-186959 | Gomes 2011                  |
| Aldeia             | 1800 ± 40 | Beta-283903 | Gomes 2011                  |
| Maguari            | 1680 ± 30 | Beta-433636 | this study                  |
| Porto              | 1550 ± 30 | Beta-386144 | this study                  |
| Terra Preta        | 1320 ± 60 | Beta-178443 | Gomes 2011                  |
| Porto              | 1260 ± 30 | Beta-386139 | this study                  |
| Fé em Deus         | 1220 ± 30 | Beta-324179 | this study                  |
| Iruçanga           | 1220 ± 30 | Beta-324179 | Schaan 2016 <sup>15</sup>   |
| Terra Preta        | 1220 ± 60 | Beta-178442 | Gomes 2011                  |
| Porto              | 1210 ± 30 | Beta-388952 | this study                  |
| Maguari            | 1190 ± 30 | Beta-433633 | this study                  |
| Porto              | 1140 ± 30 | Beta-386135 | this study                  |
| Lago do Jacaré 1   | 1020 ± 50 | Beta-186954 | Gomes 2011                  |
| Porto              | 960 ± 30  | Beta-322202 | Alves 2012                  |
| Terra Preta        | 910 ± 60  | Beta-178444 | Gomes 2011                  |
| Serraria Trombetas | 890 ± 30  | Beta-293289 | Martins 2012                |
| Serraria Trombetas | 780 ± 30  | Beta-324188 | Martins 2012                |
| Alvorada           | 680 ± 50  | Beta-293282 | Martins 2012                |
| Porto              | 664 ± 57  | WK6844      | Quinn 2004                  |
| Porto              | 660 ± 30  | Beta-386141 | this study                  |
| Porto              | 652 ± 56  | WK6837      | Quinn 2004                  |
| Porto              | 650 ± 59  | WK6843      | Quinn 2004                  |
| Porto              | 640 ± 30  | Beta-386134 | this study                  |
| Porto              | 590 ± 30  | Beta-386136 | this study                  |
| Bom Futuro         | 586 ± 30  | Ua-46306    | Stenborg 2016 <sup>16</sup> |

|                    |          |             |               |
|--------------------|----------|-------------|---------------|
| Porto              | 586 ± 56 | WK6839      | Quinn 2004    |
| Porto              | 583 ± 57 | WK6833      | Quinn 2004    |
| Serraria Trombetas | 580 ± 30 | Beta-324187 | Martins 2012  |
| Cedro              | 550 ± 30 | Beta-324192 | Schaan 2016   |
| Bom Futuro         | 540 ± 30 | Ua-46305    | Stenborg 2016 |
| Porto              | 537 ± 58 | WK6840      | Quinn 2004    |
| Porto              | 512 ± 59 | WK6846      | Quinn 2004    |
| Porto              | 500 ± 30 | Beta-386140 | this study    |
| Bom Futuro         | 497 ± 30 | Ua-46304    | Stenborg 2016 |
| Porto              | 490 ± 30 | Beta-386148 | this study    |
| Maguari            | 470 ± 30 | Beta-433637 | this study    |
| Fazenda Cacau      | 460 ± 30 | Beta-293286 | Martins 2012  |
| Porto              | 460 ± 30 | Beta-386142 | this study    |
| Porto              | 455 ± 63 | WK6845      | Quinn 2004    |
| Porto              | 452 ± 57 | Wk6837      | Quinn 2004    |
| Maguari            | 430 ± 30 | Beta-433632 | this study    |
| Porto              | 425 ± 56 | WK6841      | Quinn 2004    |
| Porto              | 418 ± 59 | WK6842      | Quinn 2004    |
| Porto              | 413 ± 56 | WK6838      | Quinn 2004    |
| Porto              | 410 ± 30 | Beta-386146 | this study    |
| Porto              | 400 ± 30 | Beta-386147 | this study    |
| Porto              | 400 ± 30 | Beta-388951 | this study    |
| Maguari            | 390 ± 30 | Beta-433631 | this study    |
| Maguari            | 390 ± 30 | Beta-433630 | this study    |
| Porto              | 386 ± 62 | WK6832      | Quinn 2004    |
| Maguari            | 380 ± 30 | Beta-433629 | this study    |

|            |          |             |             |
|------------|----------|-------------|-------------|
| Porto      | 380 ± 64 | WK6835      | Quinn 2004  |
| Bom Futuro | 350 ± 30 | Beta-324178 | Schaan 2016 |
| Maguari    | 330 ± 30 | Beta-433635 | this study  |
| Amapá      | 300 ± 30 | Beta-324176 | Schaan 2016 |
| Maguari    | 300 ± 30 | Beta-433634 | this study  |
| Maguari    | 290 ± 30 | Beta-433628 | this study  |
| Cedro      | 240 ± 30 | Beta-324193 | Schaan 2016 |

Table S3. *Dates for local and regional archaeology.*



| Individual sum                             | Sites   |          |          |          |       |       |
|--------------------------------------------|---------|----------|----------|----------|-------|-------|
|                                            | Species | Non-ADE2 | Non-ADE3 | Non-ADE5 | ADE 1 | ADE 3 |
| <i>Abarema auriculata</i> Fabaceae         | 4       | 2        | 0        | 0        | 0     | 0     |
| <i>Abuta sp.</i> Menispermaceae            | 1       | 0        | 0        | 0        | 0     | 0     |
| <i>Acrocomia aculeata</i> Arecaceae        | 0       | 0        | 0        | 0        | 0     | 2     |
| <i>Agonandra silvatica</i> Opiliaceae      | 0       | 0        | 0        | 0        | 0     | 0     |
| <i>Amphiodon effusus</i> Fabaceae          | 2       | 1        | 2        | 0        | 1     | 0     |
| Anacardiaceae Anacardiaceae                | 1       | 0        | 0        | 0        | 0     | 2     |
| <i>Aniba panurensis</i> Lauraceae          | 0       | 0        | 1        | 0        | 0     | 0     |
| <i>Aniba rosaeodora</i> Lauraceae          | 1       | 0        | 0        | 1        | 0     | 0     |
| <i>Anthodon sp.</i> Celastraceae           | 0       | 0        | 0        | 0        | 0     | 0     |
| <i>Aparisthium cordatum</i> Euphorbiaceae  | 0       | 0        | 0        | 0        | 0     | 0     |
| <i>Apuleia leiocarpa</i> Fabaceae          | 1       | 0        | 0        | 3        | 0     | 1     |
| <i>Aspidosperma discolor</i> Apocynaceae   | 0       | 0        | 0        | 0        | 0     | 0     |
| <i>Aspidosperma spruceanum</i> Apocynaceae | 0       | 1        | 0        | 0        | 0     | 0     |
| <i>Astrocaryum aculeatum</i> Arecaceae     | 0       | 0        | 0        | 0        | 0     | 1     |
| <i>Astrocaryum vulgare</i> Arecaceae       | 0       | 0        | 0        | 0        | 0     | 6     |
| <i>Astronium graveolens</i> Anacardiaceae  | 0       | 0        | 0        | 0        | 0     | 0     |
| <i>Astronium lecointei</i> Anacardiaceae   | 0       | 0        | 0        | 0        | 1     | 0     |
| <i>Attalea microcarpa</i> Arecaceae        | 0       | 0        | 0        | 0        | 5     | 0     |
| <i>Attalea speciose</i> Arecaceae          | 0       | 0        | 0        | 2        | 0     | 4     |
| <i>Bagassa guianensis</i> Moraceae         | 0       | 0        | 0        | 0        | 0     | 0     |
| <i>Bauhinia sp.</i> Fabaceae               | 0       | 0        | 0        | 1        | 0     | 0     |
| <i>Bauhinia unguate</i> Fabaceae           | 0       | 0        | 0        | 0        | 0     | 0     |
| <i>Bellucia dichotoma</i> Melastomataceae  | 0       | 0        | 0        | 0        | 0     | 0     |

|                                                    |   |   |   |   |   |   |
|----------------------------------------------------|---|---|---|---|---|---|
| <i>Bellucia grossularioides</i><br>Melastomataceae | 0 | 1 | 0 | 0 | 0 | 0 |
| <i>Bertholletia excelsia</i> Lecythidaceae         | 1 | 1 | 0 | 3 | 2 | 4 |
| <i>Bignoniaceae</i> Bignoniaceae                   | 0 | 0 | 0 | 0 | 1 | 0 |
| <i>Bowdichia nitida</i> Fabaceae                   | 0 | 1 | 0 | 0 | 0 | 0 |
| <i>Bowdichia sp1</i> Fabaceae                      | 0 | 0 | 0 | 1 | 0 | 0 |
| <i>Bowdichia sp2</i> Fabaceae                      | 0 | 0 | 0 | 0 | 0 | 0 |
| <i>Brosimum acutifolium</i> Moraceae               | 0 | 0 | 0 | 0 | 0 | 0 |
| <i>Brosimum lactescens</i> Moraceae                | 2 | 1 | 0 | 0 | 0 | 0 |
| <i>Buchenavia tetraphylla</i> Combretaceae         | 1 | 0 | 0 | 0 | 0 | 0 |
| <i>Buchenavia viridiflora</i> Combretaceae         | 0 | 0 | 0 | 0 | 1 | 0 |
| <i>Byrsonima crispera</i> Malpighiaceae            | 0 | 1 | 0 | 0 | 0 | 0 |
| <i>Cardiopetalum calophyllum</i> Annonaceae        | 0 | 0 | 0 | 0 | 0 | 1 |
| <i>Cariniana rubra</i> Lecythidaceae               | 0 | 0 | 0 | 1 | 0 | 0 |
| <i>Caryocar villosum</i> Caryocaraceae             | 0 | 0 | 0 | 0 | 0 | 0 |
| <i>Casearia commersoniana</i> Salicaceae           | 0 | 0 | 0 | 1 | 0 | 0 |
| <i>Casearia gossypiosperma</i> Salicaceae          | 0 | 0 | 0 | 1 | 0 | 1 |
| <i>Casearia sp1</i> Salicaceae                     | 1 | 0 | 0 | 0 | 0 | 0 |
| <i>Casearia sp2</i> Salicaceae                     | 0 | 0 | 0 | 2 | 0 | 0 |
| <i>Cathedra acuminata</i> Olacaceae                | 0 | 1 | 2 | 0 | 0 | 0 |
| <i>Cecropia ficifolia</i> Urticaceae               | 0 | 0 | 0 | 4 | 5 | 0 |
| <i>Cecropia sciadophylla</i> Urticaceae            | 0 | 1 | 0 | 0 | 0 | 0 |
| <i>Cedrela odorata</i> Meliaceae                   | 0 | 0 | 0 | 0 | 0 | 2 |
| <i>Ceiba pentandra</i> Malvaceae                   | 0 | 0 | 0 | 0 | 0 | 0 |
| <i>Celtis iguanaea</i> Cannabaceae                 | 0 | 0 | 0 | 0 | 1 | 0 |
| <i>Clarisia racemosa</i> Moraceae                  | 0 | 0 | 0 | 0 | 0 | 0 |

|                                                  |   |    |   |   |   |   |
|--------------------------------------------------|---|----|---|---|---|---|
| <i>Coccoloba</i> sp. Polygonaceae                | 0 | 0  | 0 | 1 | 2 | 0 |
| <i>Cochlospermum orinocense</i> Bixaceae         | 0 | 0  | 0 | 0 | 0 | 0 |
| <i>Connarus perrottetii</i> Connaraceae          | 0 | 0  | 0 | 0 | 0 | 0 |
| <i>Copaifera</i> sp. Fabaceae                    | 0 | 0  | 2 | 0 | 0 | 0 |
| <i>Cordia</i> sp. Boraginaceae                   | 0 | 1  | 1 | 2 | 4 | 0 |
| <i>Couepia</i> sp. Chrysobalanaceae              | 0 | 0  | 0 | 0 | 0 | 0 |
| <i>Couratari stellate</i> Lecythidaceae          | 1 | 0  | 2 | 0 | 0 | 0 |
| <i>Coussarea duckei</i> Rubiaceae                | 1 | 0  | 0 | 0 | 0 | 0 |
| <i>Coussarea paniculata</i> Rubiaceae            | 8 | 16 | 0 | 0 | 0 | 0 |
| <i>Crepidospermum goudotianum</i><br>Burseraceae | 0 | 0  | 0 | 0 | 0 | 0 |
| <i>Croton</i> sp. Euphorbiaceae                  | 0 | 0  | 0 | 3 | 0 | 0 |
| <i>Cupania scrobiculata</i> Sapindaceae          | 0 | 0  | 0 | 0 | 0 | 0 |
| <i>Dialium guianense</i> Fabaceae                | 1 | 2  | 1 | 1 | 7 | 1 |
| <i>Dimorphandra parviflora</i> Fabaceae          | 1 | 0  | 0 | 0 | 0 | 0 |
| <i>Dinizia excelsa</i> Fabaceae                  | 0 | 0  | 1 | 0 | 0 | 0 |
| <i>Diospyros cavalcantei</i> Ebenaceae           | 0 | 0  | 0 | 0 | 0 | 0 |
| <i>Diospyros guianensis</i> Ebenaceae            | 0 | 1  | 0 | 0 | 0 | 0 |
| <i>Diploptropis</i> sp1 Fabaceae                 | 0 | 0  | 1 | 0 | 0 | 0 |
| <i>Diploptropis</i> sp2 Fabaceae                 | 0 | 0  | 0 | 0 | 1 | 0 |
| <i>Dipteryx odorata</i> Fabaceae                 | 0 | 1  | 0 | 0 | 0 | 0 |
| <i>Duguetia echinophora</i> Annonaceae           | 2 | 4  | 0 | 0 | 0 | 0 |
| <i>Duguetia</i> Annonaceae                       | 0 | 0  | 0 | 1 | 0 | 0 |
| <i>Duroia genipoides</i> Rubiaceae               | 1 | 0  | 0 | 0 | 0 | 0 |
| <i>Duroia macrophylla</i> Rubiaceae              | 0 | 1  | 0 | 0 | 0 | 0 |
| <i>Enterolobium schomburgkii</i> Fabaceae        | 0 | 1  | 0 | 0 | 0 | 0 |

|                                                 |   |    |   |   |   |   |
|-------------------------------------------------|---|----|---|---|---|---|
| <i>Ephedranthus parviflorus</i> Annonaceae      | 0 | 0  | 0 | 0 | 0 | 0 |
| <i>Eriotheca globosa</i> Malvaceae              | 0 | 0  | 0 | 0 | 2 | 1 |
| <i>Erisma calcaratum</i> Vochysiaceae           | 1 | 0  | 0 | 0 | 0 | 0 |
| <i>Erisma uncinatum</i> Vochysiaceae            | 2 | 10 | 2 | 0 | 0 | 0 |
| <i>Eschweilera coriacea</i> Lecythidaceae       | 8 | 5  | 7 | 3 | 0 | 1 |
| <i>Eschweilera grandiflora</i> Lecythidaceae    | 1 | 4  | 2 | 1 | 0 | 0 |
| <i>Eschweilera obversa</i> Lecythidaceae        | 0 | 0  | 0 | 0 | 0 | 0 |
| <i>Eugenia cupulata</i> Myrtaceae               | 0 | 1  | 0 | 0 | 0 | 0 |
| <i>Eugenia patens</i> Myrtaceae                 | 0 | 0  | 0 | 0 | 1 | 0 |
| <i>Eugenia sp1</i> Myrtaceae                    | 0 | 0  | 0 | 0 | 1 | 0 |
| <i>Eugenia sp2</i> Myrtaceae                    | 0 | 0  | 1 | 0 | 0 | 0 |
| <i>Euphorbiaceae-1</i> Euphorbiaceae            | 0 | 0  | 0 | 0 | 0 | 0 |
| <i>Euphorbiaceae-2</i> Euphorbiaceae            | 0 | 0  | 0 | 0 | 0 | 0 |
| <i>Exostyles amazonica</i> Fabaceae             | 0 | 0  | 0 | 1 | 0 | 0 |
| Fabaceae-1 Fabaceae                             | 0 | 0  | 1 | 1 | 0 | 0 |
| Fabaceae-2 Fabaceae                             | 0 | 0  | 0 | 1 | 0 | 0 |
| Fabaceae-3 Fabaceae                             | 1 | 0  | 0 | 0 | 0 | 0 |
| Fabaceae-4 Fabaceae                             | 0 | 0  | 0 | 0 | 1 | 0 |
| <i>Ficus sp1</i> Moraceae                       | 0 | 0  | 0 | 0 | 0 | 1 |
| <i>Geissospermum urceolatum</i><br>Apocynaceae  | 2 | 1  | 1 | 0 | 0 | 0 |
| <i>Glycydendron amazonicum</i><br>Euphorbiaceae | 1 | 2  | 0 | 0 | 0 | 0 |
| <i>Guatteria poeppigiana</i> Annonaceae         | 1 | 0  | 1 | 1 | 0 | 0 |
| <i>Guatteria sp1</i> Annonaceae                 | 0 | 0  | 0 | 0 | 0 | 0 |
| <i>Guatteria sp2</i> Annonaceae                 | 0 | 0  | 0 | 0 | 0 | 0 |
| <i>Guazuma ulmifolia</i> Malvaceae              | 0 | 0  | 0 | 0 | 0 | 0 |

|                                              |   |   |   |   |   |    |
|----------------------------------------------|---|---|---|---|---|----|
| <i>Gustavia augusta</i> Lecythidaceae        | 0 | 0 | 0 | 0 | 2 | 0  |
| <i>Gustavia longepetiolata</i> Lecythidaceae | 0 | 0 | 0 | 0 | 1 | 0  |
| <i>Handroanthus capitatus</i> Bignoniaceae   | 0 | 0 | 0 | 0 | 0 | 0  |
| <i>Handroanthus incanus</i> Bignoniaceae     | 0 | 0 | 0 | 0 | 0 | 0  |
| <i>Heisteria sp.</i> Olacaceae               | 0 | 1 | 0 | 0 | 0 | 0  |
| <i>Helicostylis elegans</i> Moraceae         | 0 | 0 | 0 | 0 | 1 | 0  |
| <i>Helicostylis tomentosa</i> Moraceae       | 0 | 1 | 0 | 1 | 1 | 0  |
| <i>Hevea brasiliensis</i> Euphorbiaceae      | 0 | 0 | 0 | 0 | 0 | 12 |
| <i>Homalium racemosum</i> Salicaceae         | 2 | 0 | 1 | 0 | 0 | 0  |
| <i>Hymenaea courbaril</i> Fabaceae           | 0 | 0 | 0 | 0 | 1 | 0  |
| <i>Inga alba</i> Fabaceae                    | 2 | 0 | 0 | 1 | 0 | 2  |
| <i>Inga edulis</i> Fabaceae                  | 0 | 0 | 0 | 0 | 3 | 0  |
| <i>Inga laurina</i> Fabaceae                 | 0 | 0 | 1 | 0 | 0 | 0  |
| <i>Inga marginata</i> Fabaceae               | 0 | 0 | 0 | 0 | 1 | 0  |
| <i>Inga nobilis</i> Fabaceae                 | 0 | 0 | 0 | 0 | 1 | 1  |
| <i>Inga sp1</i> Fabaceae                     | 0 | 1 | 0 | 0 | 0 | 0  |
| <i>Inga sp2</i> Fabaceae                     | 0 | 0 | 1 | 0 | 0 | 0  |
| <i>Iryanthera juruensis</i> Myristicaceae    | 0 | 0 | 0 | 0 | 0 | 0  |
| <i>Jacaranda copaia</i> Bignoniaceae         | 1 | 0 | 0 | 0 | 0 | 0  |
| <i>Jacaratia spinosa</i> Caricaceae          | 0 | 0 | 0 | 0 | 2 | 0  |
| <i>Lacmellea arborescens</i> Apocynaceae     | 0 | 1 | 0 | 2 | 0 | 0  |
| Lauraceae-1 Lauraceae                        | 2 | 0 | 0 | 0 | 0 | 0  |
| Lauraceae-2 Lauraceae                        | 0 | 0 | 1 | 0 | 0 | 0  |
| Lauraceae-3 Lauraceae                        | 0 | 0 | 1 | 0 | 0 | 0  |
| <i>Lecythis lurida</i> Lecythidaceae         | 1 | 0 | 1 | 0 | 0 | 0  |
| <i>Lecythis Pisonis</i> Lecythidaceae        | 0 | 0 | 0 | 0 | 0 | 0  |

|                                            |   |   |   |   |   |   |
|--------------------------------------------|---|---|---|---|---|---|
| <i>Leonia</i> sp. Violaceae                | 0 | 1 | 0 | 0 | 0 | 0 |
| <i>Licania kunthiana</i> Chrysobalanaceae  | 0 | 0 | 0 | 0 | 0 | 0 |
| <i>Licania polita</i> Chrysobalanaceae     | 1 | 0 | 1 | 3 | 1 | 0 |
| <i>Licaria guianensis</i> Lauraceae        | 0 | 0 | 0 | 0 | 0 | 0 |
| <i>Lonchocarpus</i> sp. Fabaceae           | 0 | 0 | 0 | 0 | 1 | 0 |
| <i>Luehea cymulosa</i> Malvaceae           | 1 | 0 | 0 | 2 | 0 | 1 |
| <i>Machaerium amplum</i> Fabaceae          | 1 | 0 | 0 | 0 | 0 | 0 |
| <i>Machaerium isadelphum</i> Fabaceae      | 0 | 0 | 0 | 0 | 1 | 1 |
| <i>Machaerium</i> sp1 Fabaceae             | 0 | 0 | 0 | 0 | 0 | 0 |
| <i>Machaerium</i> sp2 Fabaceae             | 0 | 0 | 0 | 0 | 0 | 0 |
| <i>Machaerium</i> sp3 Fabaceae             | 0 | 0 | 0 | 0 | 0 | 0 |
| <i>Machaerium</i> sp4 Fabaceae             | 1 | 0 | 0 | 0 | 0 | 0 |
| <i>Maclura tinctoria</i> Moraceae          | 0 | 0 | 0 | 0 | 0 | 0 |
| <i>Malpighiaceae</i> Malpighiaceae         | 0 | 0 | 0 | 0 | 0 | 1 |
| Malvaceae 1 Malvaceae                      | 0 | 0 | 0 | 0 | 0 | 0 |
| <i>Matayba guianensis</i> Sapindaceae      | 0 | 0 | 0 | 0 | 0 | 0 |
| <i>Matayba</i> sp. Sapindaceae             | 1 | 0 | 0 | 0 | 0 | 0 |
| <i>Matayba spruceana</i> Sapindaceae       | 2 | 1 | 0 | 0 | 0 | 0 |
| <i>Mezilaurus itauba</i> Lauraceae         | 1 | 0 | 1 | 0 | 1 | 0 |
| <i>Miconia affinis</i> Melastomataceae     | 0 | 0 | 0 | 0 | 1 | 0 |
| <i>Miconia egensis</i> Melastomataceae     | 1 | 0 | 0 | 0 | 0 | 0 |
| <i>Miconia regelii</i> Melastomataceae     | 1 | 0 | 0 | 0 | 0 | 0 |
| <i>Miconia tomentosa</i> Melastomataceae   | 1 | 0 | 0 | 0 | 0 | 0 |
| <i>Minquartia guianensis</i> Olacaceae     | 1 | 0 | 1 | 0 | 0 | 0 |
| <i>Mouriri grandiflora</i> Melastomataceae | 0 | 0 | 0 | 0 | 0 | 0 |
| <i>Mouriri</i> sp. Melastomataceae         | 0 | 0 | 0 | 0 | 0 | 0 |

|                                               |   |   |   |   |   |   |
|-----------------------------------------------|---|---|---|---|---|---|
| <i>Moutabea sp.</i> Polygalaceae              | 0 | 0 | 0 | 0 | 0 | 0 |
| <i>Myrcia sp1</i> Myrtaceae                   | 1 | 0 | 0 | 1 | 0 | 0 |
| <i>Myrcia sp2</i> Myrtaceae                   | 0 | 0 | 0 | 0 | 0 | 0 |
| <i>Myrciaria floribunda</i> Myrtaceae         | 1 | 0 | 0 | 0 | 0 | 0 |
| <i>Neea oppositifolia</i> Nyctaginaceae       | 1 | 1 | 1 | 2 | 5 | 0 |
| <i>NI-1 NI-1</i>                              | 0 | 0 | 0 | 0 | 0 | 1 |
| <i>NI-2 NI-2</i>                              | 0 | 0 | 0 | 0 | 0 | 0 |
| <i>NI-3 NI-3</i>                              | 0 | 0 | 0 | 0 | 0 | 0 |
| <i>NI-4 NI-4</i>                              | 0 | 0 | 0 | 0 | 1 | 0 |
| <i>NI-5 NI-5</i>                              | 0 | 0 | 0 | 0 | 1 | 0 |
| <i>NI-6 NI-6</i>                              | 0 | 0 | 1 | 0 | 0 | 0 |
| <i>Ocotea camphoromoea</i> Lauraceae          | 1 | 1 | 0 | 0 | 0 | 0 |
| <i>Ocotea cujumary</i> Lauraceae              | 0 | 0 | 3 | 0 | 0 | 0 |
| <i>Ocotea cymbarum</i> Lauraceae              | 0 | 0 | 0 | 3 | 0 | 1 |
| <i>Ocotea floribunda</i> Lauraceae            | 0 | 0 | 1 | 0 | 0 | 0 |
| <i>Ocotea glomerata</i> Lauraceae             | 0 | 0 | 0 | 0 | 0 | 0 |
| <i>Ocotea longifolia</i> Lauraceae            | 0 | 0 | 0 | 0 | 0 | 0 |
| <i>Ocotea pauciflora</i> Lauraceae            | 0 | 1 | 3 | 0 | 0 | 0 |
| <i>Ocotea sp1</i> Lauraceae                   | 1 | 0 | 0 | 0 | 0 | 0 |
| <i>Ocotea viburnoides</i> Lauraceae           | 1 | 0 | 0 | 0 | 0 | 0 |
| <i>Oenocarpus distichus</i> Arecaceae         | 2 | 0 | 6 | 1 | 0 | 0 |
| Olacaceae Olacaceae                           | 0 | 0 | 1 | 0 | 0 | 0 |
| <i>Onychopetalum amazonicum</i><br>Annonaceae | 0 | 0 | 0 | 0 | 0 | 0 |
| <i>Ormosia sp.</i> Fabaceae                   | 0 | 0 | 5 | 0 | 0 | 0 |
| <i>Ouratea sp.</i> Ochnaceae                  | 2 | 0 | 0 | 0 | 0 | 0 |

|                                             |   |   |   |   |   |   |
|---------------------------------------------|---|---|---|---|---|---|
| <i>Platymiscium sp.</i> Fabaceae            | 1 | 0 | 0 | 0 | 0 | 0 |
| <i>Poeppigia procera</i> Fabaceae           | 0 | 0 | 0 | 0 | 0 | 2 |
| Polygalaceae Polygalaceae                   | 0 | 0 | 0 | 0 | 0 | 0 |
| <i>Pouteria campanulata</i> Sapotaceae      | 0 | 0 | 0 | 1 | 1 | 0 |
| <i>Pouteria decorticans</i> Sapotaceae      | 4 | 2 | 1 | 3 | 0 | 0 |
| <i>Pouteria glomerata</i> Sapotaceae        | 0 | 0 | 0 | 0 | 0 | 0 |
| <i>Pouteria sp1</i> Sapotaceae              | 1 | 0 | 0 | 1 | 1 | 0 |
| <i>Pouteria sp2</i> Sapotaceae              | 0 | 6 | 0 | 0 | 0 | 0 |
| <i>Pouteria sp3</i> Sapotaceae              | 0 | 2 | 0 | 0 | 0 | 0 |
| <i>Pouteria speciosa Baehni</i> Sapotaceae  | 2 | 1 | 0 | 0 | 1 | 0 |
| <i>Pouteria torta</i> Sapotaceae            | 0 | 0 | 0 | 0 | 0 | 0 |
| <i>Pouteria venosa</i> Sapotaceae           | 1 | 2 | 0 | 3 | 2 | 1 |
| <i>Protium aracouchini</i> Burseraceae      | 0 | 0 | 1 | 0 | 0 | 0 |
| <i>Protium gallosum</i> Burseraceae         | 1 | 0 | 0 | 0 | 0 | 0 |
| <i>Protium hebetatum</i> Burseraceae        | 2 | 1 | 8 | 0 | 0 | 0 |
| <i>Protium robustum</i> Burseraceae         | 0 | 2 | 0 | 0 | 1 | 0 |
| <i>Protium sp1</i> Burseraceae              | 1 | 0 | 1 | 0 | 0 | 0 |
| <i>Protium sp2</i> Burseraceae              | 0 | 0 | 1 | 0 | 0 | 0 |
| <i>Protium unifoliolatum</i> Burseraceae    | 0 | 0 | 0 | 0 | 0 | 3 |
| <i>Pseudolmedia laevigata</i> Moraceae      | 0 | 1 | 0 | 0 | 0 | 0 |
| <i>Pseudolmedia macrophylla</i> Moraceae    | 0 | 0 | 0 | 0 | 1 | 0 |
| <i>Pseudopiptadenia suaveolens</i> Fabaceae | 0 | 0 | 0 | 0 | 0 | 0 |
| <i>Psidium sp.</i> Myrtaceae                | 0 | 0 | 0 | 0 | 0 | 0 |
| <i>Pterocarpus sp.</i> Fabaceae             | 0 | 0 | 0 | 1 | 0 | 0 |
| <i>Qualea sp.</i> Vochysiaceae              | 0 | 0 | 0 | 0 | 0 | 0 |
| <i>Quiina amazonica</i> Ochnaceae           | 0 | 1 | 0 | 0 | 0 | 0 |



|                                                 |   |   |   |   |   |   |
|-------------------------------------------------|---|---|---|---|---|---|
| <i>Rinoreocarpus ulei</i> Violaceae             | 2 | 0 | 3 | 4 | 0 | 0 |
| <i>Salicaceae</i> Salicaceae                    | 0 | 1 | 0 | 0 | 0 | 0 |
| <i>Sapindus saponaria</i> Sapindaceae           | 0 | 0 | 0 | 0 | 0 | 2 |
| <i>Sapium glandulosum</i> Euphorbiaceae         | 0 | 0 | 0 | 0 | 0 | 1 |
| <i>Sarcoaulus brasiliensis</i> Sapotaceae       | 1 | 0 | 1 | 0 | 1 | 0 |
| <i>Schefflera morototoni</i> Araliaceae         | 0 | 1 | 1 | 0 | 0 | 1 |
| <i>Senegalia polyphylla</i> Fabaceae            | 0 | 0 | 0 | 0 | 0 | 5 |
| <i>Sloanea floribunda</i> Elaeocarpaceae        | 0 | 0 | 0 | 0 | 0 | 0 |
| <i>Sloanea obtusifolia</i> Elaeocarpaceae       | 0 | 0 | 0 | 0 | 1 | 0 |
| <i>Solanum acanthodes</i> Solanaceae            | 0 | 0 | 0 | 1 | 0 | 0 |
| <i>Sorocea sp1</i> Moraceae                     | 1 | 0 | 0 | 2 | 0 | 0 |
| <i>Spondias mombin</i> Anacardiaceae            | 0 | 0 | 0 | 0 | 7 | 9 |
| <i>Sterculia apetala</i> Malvaceae              | 0 | 0 | 0 | 0 | 0 | 0 |
| <i>Stryphnodendron pulcherrimum</i><br>Fabaceae | 0 | 0 | 0 | 0 | 1 | 0 |
| <i>Stryphnodendron sp.</i> Fabaceae             | 0 | 0 | 0 | 0 | 0 | 0 |
| <i>Swartzia sp.</i> Fabaceae                    | 0 | 0 | 0 | 0 | 0 | 0 |
| <i>Tabernaemontana sp.</i> Apocynaceae          | 0 | 0 | 0 | 0 | 0 | 0 |
| <i>Tachigali chrysophylla</i> Fabaceae          | 2 | 2 | 3 | 0 | 3 | 0 |
| <i>Tachigali melanocarpa</i> Fabaceae           | 7 | 6 | 9 | 0 | 0 | 0 |
| <i>Tachigali paniculata</i> Fabaceae            | 0 | 0 | 0 | 0 | 2 | 0 |
| <i>Tachigali paniculata</i> Fabaceae            | 9 | 7 | 6 | 0 | 0 | 0 |
| <i>Talisia cerasina</i> Sapindaceae             | 1 | 0 | 0 | 2 | 2 | 1 |
| <i>Talisia veraluciana</i> Sapindaceae          | 0 | 0 | 0 | 0 | 0 | 0 |
| <i>Terminalia dichotoma</i> Combretaceae        | 0 | 0 | 1 | 0 | 0 | 0 |
| <i>Tetragastris altissima</i> Burseraceae       | 0 | 0 | 0 | 2 | 0 | 0 |

|                                                      |            |            |            |           |           |           |
|------------------------------------------------------|------------|------------|------------|-----------|-----------|-----------|
| <i>Tetragastris panamensis</i> Kuntze<br>Burseraceae | 0          | 0          | 2          | 0         | 0         | 1         |
| <i>Tetragastris sp.</i> Burseraceae                  | 0          | 0          | 5          | 0         | 0         | 0         |
| <i>Theobroma obovatum</i> Malvaceae                  | 0          | 1          | 0          | 0         | 0         | 0         |
| <i>Theobroma speciosum</i> Malvaceae                 | 1          | 1          | 0          | 5         | 5         | 0         |
| <i>Trattinnickia boliviana</i> Burseraceae           | 0          | 0          | 0          | 0         | 1         | 0         |
| <i>Trema micrantha</i> Cannabaceae                   | 0          | 0          | 0          | 1         | 0         | 0         |
| <i>Trichilia micrantha</i> Meliaceae                 | 0          | 0          | 0          | 1         | 0         | 0         |
| <i>Vatairea sericea</i> Fabaceae                     | 0          | 0          | 0          | 0         | 0         | 0         |
| <i>Vataireopsis sp.</i> Fabaceae                     | 0          | 0          | 0          | 0         | 0         | 0         |
| Violaceae Violaceae                                  | 0          | 0          | 0          | 0         | 0         | 1         |
| <i>Virola michelii</i> Myristicaceae                 | 12         | 6          | 8          | 0         | 2         | 0         |
| <i>Virola sebifera</i> Myristicaceae                 | 1          | 0          | 1          | 0         | 0         | 0         |
| <i>Vismia japurensis</i> Hypericaceae                | 0          | 0          | 0          | 0         | 0         | 0         |
| <i>Vitex orinocensis</i> Lamiaceae                   | 0          | 0          | 0          | 0         | 0         | 0         |
| <i>Vochysia maxima</i> Vochysiaceae                  | 1          | 0          | 0          | 0         | 0         | 0         |
| <i>Vochysia obidensis</i> Vochysiaceae               | 0          | 2          | 0          | 0         | 0         | 0         |
| <i>Xylopia frutescens</i> Annonaceae                 | 0          | 0          | 0          | 0         | 0         | 1         |
| <i>Xylopia nitida</i> Annonaceae                     | 0          | 1          | 1          | 1         | 0         | 0         |
| <i>Xylopia polyantha</i> Annonaceae                  | 2          | 1          | 0          | 0         | 1         | 0         |
| <i>Zanthoxylum rhoifolium</i> Rutaceae               | 0          | 0          | 0          | 0         | 0         | 0         |
| <i>Zanthoxylum sp.</i> Rutaceae                      | 0          | 0          | 0          | 0         | 0         | 0         |
| <b>Total</b>                                         | <b>130</b> | <b>117</b> | <b>111</b> | <b>80</b> | <b>94</b> | <b>76</b> |

Table S4. Complete botanical inventory data

| <b>Genus</b>         | <b>Species</b>      | <b>Family</b> | <b>Type of food</b>          | <b>Edible</b> |
|----------------------|---------------------|---------------|------------------------------|---------------|
| <i>Achyranthes</i>   | <i>aspera</i>       | Amaranthaceae | vegetable                    | edible        |
| <i>Acrocomia</i>     | <i>aculeata</i>     | Arecaceae     | fruit                        | edible        |
| <i>Agave</i>         | spp.                | Agavaceae     | beverage                     | edible        |
| <i>Aiphanes</i>      | <i>aculeata</i>     | Arecaceae     | fruit                        | edible        |
| <i>Alibertia</i>     | <i>edulis</i>       | Rubiaceae     | fruit                        | edible        |
| <i>Alibertia</i>     | <i>myrciifolia</i>  | Rubiaceae     | food                         | edible        |
| <i>Alternanthera</i> | <i>bettzickiana</i> | Amaranthaceae | vegetable                    | edible        |
| <i>Amaranthus</i>    | spp.                | Amaranthaceae | grain and vegetables         | edible        |
| <i>Ambelania</i>     | <i>acida</i>        | Apocynaceae   | fruit                        | edible        |
| <i>Anacardium</i>    | <i>giganteum</i>    | Anacardiaceae | fruit                        | edible        |
| <i>Anacardium</i>    | <i>occidentale</i>  | Anacardiaceae | fruit                        | edible        |
| <i>Ananas</i>        | <i>comosus</i>      | Bromeliaceae  | fruit                        | edible        |
| <i>Aniba</i>         | <i>rosiodora</i>    | Lauraceae     | oil of wood as food additive | edible        |
| <i>Annona</i>        | <i>montana</i>      | Annonaceae    | fruit                        | edible        |
| <i>Annona</i>        | <i>montana</i>      | Annonaceae    | fruit                        | edible        |
| <i>Annona</i>        | <i>muricata</i>     | Annonaceae    | fruit                        | edible        |
| <i>Annona</i>        | <i>reticulata</i>   | Annonaceae    | fruit                        | edible        |
| <i>Annona</i>        | <i>squamosa</i>     | Annonaceae    | fruit                        | edible        |
| <i>Aphandra</i>      | <i>natalia</i>      | Arecaceae     | fruit                        | edible        |
| <i>Arachis</i>       | <i>hypogaea</i>     | Fabaceae      | seed                         | edible        |
| <i>Astrocaryum</i>   | <i>aculeatum</i>    | Arecaceae     | fruit                        | edible        |
| <i>Astrocaryum</i>   | <i>murumuru</i>     | Arecaceae     | fruit                        | edible        |
| <i>Astrocaryum</i>   | <i>vulgare</i>      | Arecaceae     | fruit                        | edible        |
| <i>Attalea</i>       | <i>maripa</i>       | Arecaceae     | fruit                        | edible        |

|                     |                        |                 |                     |        |
|---------------------|------------------------|-----------------|---------------------|--------|
| <i>Attalea</i>      | <i>phalerata</i>       | Arecaceae       | fruit               | edible |
| <i>Attalea</i>      | <i>speciosa</i>        | Arecaceae       | fruit               | edible |
| <i>Bactris</i>      | <i>gasipaes</i>        | Arecaceae       | fruit               | edible |
| <i>Bactris</i>      | <i>guineensis</i>      | Arecaceae       | fruit               | edible |
| <i>Bellucia</i>     | <i>grossularioides</i> | Melastomataceae | fruit               | edible |
| <i>Bertholletia</i> | <i>excelsa</i>         | Lecythidaceae   | nut                 | edible |
| <i>Bixa</i>         | <i>orellana</i>        | Bixaceae        | colorant            | edible |
| <i>Bixa</i>         | <i>urucurana</i>       | Bixaceae        | colorant            | edible |
| <i>Borojoa</i>      | <i>sorbilis</i>        | Rubiaceae       | fruit               | edible |
| <i>Brosimum</i>     | <i>alicastrum</i>      | Moraceae        | edible nut          | edible |
| <i>Bunchosia</i>    | <i>armeniaca</i>       | Malpighiaceae   | fruit               | edible |
| <i>Byrsonima</i>    | <i>crassifolia</i>     | Malpighiaceae   | fruit               | edible |
| <i>Byrsonima</i>    | <i>verbascifolia</i>   | Malpighiaceae   | fruit               | edible |
| <i>Calathea</i>     | <i>allouia</i>         | Marantaceae     | root                | edible |
| <i>Campomanesia</i> | <i>aromatica</i>       | Myrtaceae       | fruit               | edible |
| <i>Campomanesia</i> | <i>lineatifolia</i>    | Myrtaceae       | fruit               | edible |
| <i>Campsiandra</i>  | <i>comosa</i>          | Fabaceae        | fruit               | edible |
| <i>Canavalia</i>    | <i>ensiformis</i>      | Fabaceae        | seed                | edible |
| <i>Canavalia</i>    | <i>plagiosperma</i>    | Fabaceae        | seed                | edible |
| <i>Canna</i>        | <i>edulis</i>          | Cannaceae       | root                | edible |
| <i>Capsicum</i>     | <i>baccatum</i>        | Solanaceae      | condiment and spice | edible |
| <i>Capsicum</i>     | <i>chinense</i>        | Solanaceae      | condiment and spice | edible |
| <i>Carica</i>       | <i>papaya</i>          | Caricaceae      | fruit               | edible |
| <i>Caryocar</i>     | <i>brasiliense</i>     | Caryocaraceae   | fruit               | edible |
| <i>Caryocar</i>     | <i>glabrum</i>         | Caryocaraceae   | nut                 | edible |
| <i>Caryocar</i>     | <i>microcarpum</i>     | Caryocaraceae   | kernels             | edible |

|                      |                       |                  |                 |        |
|----------------------|-----------------------|------------------|-----------------|--------|
| <i>Caryocar</i>      | <i>nuciferum</i>      | Caryocaraceae    | nut             | edible |
| <i>Caryocar</i>      | <i>villosum</i>       | Caryocaraceae    | fruit           | edible |
| <i>Caryodendron</i>  | <i>orinocense</i>     | Euphorbiaceae    | nut             | edible |
| <i>Casearia</i>      | <i>decandra</i>       | Flacourtiaceae   | fruit           | edible |
| <i>Cassia</i>        | <i>leiandra</i>       | Fabaceae         | fruit           | edible |
| <i>Castilla</i>      | <i>ulei</i>           | Moraceae         | fruit           | edible |
| <i>Cecropia</i>      | <i>peltata</i>        | Urticaceae       | fruit tree      | edible |
| <i>Celtis</i>        | <i>iguanaea</i>       | Cannabaceae      | fruit           | edible |
| <i>Celtis</i>        | <i>morifolia</i>      | Cannabaceae      | fruit           | edible |
| <i>Celtis</i>        | <i>occidentalis</i>   | Cannabaceae      | fruit           | edible |
| <i>Celtis</i>        | <i>reticulata</i>     | Cannabaceae      | fruit           | edible |
| <i>Chrysobalanus</i> | <i>icaco</i>          | Chrysobalanaceae | fruit           | edible |
| <i>Chrysophyllum</i> | <i>argenteum</i>      | Sapotaceae       | fruit           | edible |
| <i>Chrysophyllum</i> | <i>oliviforme</i>     | Sapotaceae       | fruit           | edible |
| <i>Chrysophyllum</i> | <i>venezuelanense</i> | Sapotaceae       | fruit           | edible |
| <i>Cissus</i>        | <i>gongylodes</i>     | Vitaceae         | fruit and stems | edible |
| <i>Coccoloba</i>     | <i>latifolia</i>      | Polygonaceae     | fruit           | edible |
| <i>Conceveiba</i>    | <i>guianensis</i>     | Euphorbiaceae    | aril            | edible |
| <i>Couepia</i>       | <i>bracteosa</i>      | Chrysobalanaceae | fruit           | edible |
| <i>Couepia</i>       | <i>chrysocalyx</i>    | Chrysobalanaceae | fruit           | edible |
| <i>Couepia</i>       | <i>edulis</i>         | Chrysobalanaceae | nut             | edible |
| <i>Couepia</i>       | <i>guianensis</i>     | Chrysobalanaceae | seeds           | edible |
| <i>Couepia</i>       | <i>longipendula</i>   | Chrysobalanaceae | nut             | edible |
| <i>Couepia</i>       | <i>subcordata</i>     | Chrysobalanaceae | fruit           | edible |
| <i>Couma</i>         | <i>guianensis</i>     | Apocynaceae      | fruit           | edible |
| <i>Couma</i>         | <i>macrocarpa</i>     | Apocynaceae      | fruit           | edible |

|                     |                      |                 |                        |        |
|---------------------|----------------------|-----------------|------------------------|--------|
| <i>Couma</i>        | <i>utilis</i>        | Apocynaceae     | fruit, latex           | edible |
| <i>Cucurbita</i>    | <i>maxima</i>        | Cucurbitaceae   | vegetable              | edible |
| <i>Cucurbita</i>    | <i>moschata</i>      | Cucurbitaceae   | vegetable              | edible |
| <i>Curatella</i>    | <i>americana</i>     | Dilleniaceae    | fruit                  | edible |
| <i>Cyclanthera</i>  | <i>pedata</i>        | Cucurbitaceae   | vegetable              | edible |
| <i>Cyperus</i>      | sp.                  | Cyperaceae      | condiment              | edible |
| <i>Desmoncus</i>    | <i>polyacanthos</i>  | Arecaceae       | fruit                  | edible |
| <i>Dialium</i>      | <i>guianense</i>     | Fabaceae        | fruit                  | edible |
| <i>Dioscorea</i>    | <i>dodecaneura</i>   | Ebenaceae       | root                   | edible |
| <i>Dioscorea</i>    | <i>trifida</i>       | Ebenaceae       | root                   | edible |
| <i>Diospyros</i>    | <i>praetermissa</i>  | Ebenaceae       | food                   | edible |
| <i>Dipteryx</i>     | <i>odorata</i>       | Fabaceae        | food flavouring        | edible |
| <i>Dipteryx</i>     | <i>punctata</i>      | Fabaceae        | food flavouring, spice | edible |
| <i>Duroia</i>       | <i>eriphila</i>      | Rubiaceae       | fruit                  | edible |
| <i>Elaeis</i>       | <i>oleifera</i>      | Arecaceae       | fruit                  | edible |
| <i>Endopleura</i>   | <i>uchi</i>          | Humiriaceae     | fruit                  | edible |
| <i>Erisma</i>       | <i>japura</i>        | Vochysiaceae    | fruit                  | edible |
| <i>Eryngium</i>     | <i>aquaticum</i>     | Apiaceae        | vegetable              | edible |
| <i>Eryngium</i>     | <i>foetidum</i>      | Apiaceae        | flavouring, vegetables | edible |
| <i>Erythroxylum</i> | <i>coca</i>          | Erythroxylaceae | stimulant              | edible |
| <i>Eschweilera</i>  | <i>Lecythidaceae</i> | Eschweilera     | coriacea               | seeds  |
| <i>Eschweilera</i>  | <i>Lecythidaceae</i> | Eschweilera     | grandifolia            | seeds  |
| <i>Eugenia</i>      | <i>stipitata</i>     | Myrtaceae       | fruit                  | edible |
| <i>Eugenia</i>      | <i>uniflora</i>      | Myrtaceae       | fruit                  | edible |
| <i>Eupatorium</i>   | <i>ayapana</i>       | Asteraceae      | condiment              | edible |
| <i>Euterpe</i>      | <i>oleracea</i>      | Arecaceae       | fruit                  | edible |

|                   |                       |                |                 |        |
|-------------------|-----------------------|----------------|-----------------|--------|
| <i>Euterpe</i>    | <i>precatoria</i>     | Arecaceae      | fruit           | edible |
| <i>Garcinia</i>   | <i>brasiliensis</i>   | Clusiaceae     | fruit           | edible |
| <i>Garcinia</i>   | <i>gardneriana</i>    | Clusiaceae     | fruit           | edible |
| <i>Garcinia</i>   | <i>intermedia</i>     | Clusiaceae     | fruit           | edible |
| <i>Garcinia</i>   | <i>macrophylla</i>    | Clusiaceae     | fruit           | edible |
| <i>Garcinia</i>   | <i>madruno</i>        | Clusiaceae     | fruit           | edible |
| <i>Genipa</i>     | <i>americana</i>      | Rubiaceae      | fruit, colorant | edible |
| <i>Grias</i>      | <i>neubertii</i>      | Lecythidaceae  | fruit           | edible |
| <i>Grias</i>      | <i>peruviana</i>      | Lecythidaceae  | fruit           | edible |
| <i>Hancornia</i>  | <i>speciosa</i>       | Apocynaceae    | fruit, latex    | edible |
| <i>Hedyosmum</i>  | <i>brasiliense</i>    | Chloranthaceae | tea             | edible |
| <i>Helianthus</i> | <i>annuus</i>         | Asteraceae     | seeds           | edible |
| <i>Heliconia</i>  | <i>hirsuta</i>        | Heliconiaceae  | root            | edible |
| <i>Hevea</i>      | <i>brasiliensis</i>   | Euphorbiaceae  | nut, latex      | edible |
| <i>Hevea</i>      | <i>spp.</i>           | Euphorbiaceae  | seed, latex     | edible |
| <i>Humiria</i>    | <i>balsamifera</i>    | Humiriaceae    | fruit           | edible |
| <i>Hymenaea</i>   | <i>courbaril</i>      | Fabaceae       | fruit           | edible |
| <i>Ilex</i>       | <i>guayusa</i>        | Aquifoliaceae  | stimulant       | edible |
| <i>Ilex</i>       | <i>paraguariensis</i> | Aquifoliaceae  | stimulant tea   | edible |
| <i>Inga</i>       | <i>alba</i>           | Fabaceae       | fruit           | edible |
| <i>Inga</i>       | <i>cinnamomea</i>     | Fabaceae       | fruit           | edible |
| <i>Inga</i>       | <i>edulis</i>         | Fabaceae       | fruit           | edible |
| <i>Inga</i>       | <i>feuillei</i>       | Fabaceae       | fruit           | edible |
| <i>Inga</i>       | <i>heterophylla</i>   | Fabaceae       | seeds           | edible |
| <i>Inga</i>       | <i>ilta</i>           | Fabaceae       | fruit           | edible |
| <i>Inga</i>       | <i>ingoides</i>       | Fabaceae       | fruit           | edible |

|                  |                      |                  |                     |        |
|------------------|----------------------|------------------|---------------------|--------|
| <i>Inga</i>      | <i>laurina</i>       | Fabaceae         | fruit               | edible |
| <i>Inga</i>      | <i>laurina</i>       | Fabaceae         | fruit               | edible |
| <i>Inga</i>      | <i>macrophylla</i>   | Fabaceae         | fruit               | edible |
| <i>Inga</i>      | <i>ornata</i>        | Fabaceae         | fruit               | edible |
| <i>Inga</i>      | <i>rubiginosa</i>    | Fabaceae         | fruit               | edible |
| <i>Inga</i>      | <i>stipularis</i>    | Fabaceae         | seeds               | edible |
| <i>Inga</i>      | <i>velutina</i>      | Fabaceae         | fruit               | edible |
| <i>Ipomoea</i>   | <i>batatas</i>       | Convolvulaceae   | root                | edible |
| <i>Isertia</i>   | <i>coccinea</i>      | Rubiaceae        | fruit               | edible |
| <i>Jacaratia</i> | <i>spinosa</i>       | Caricaceae       | fruit               | edible |
| <i>Justicia</i>  | <i>pectoralis</i>    | Acanthaceae      | stimulant           | edible |
| <i>Lacistema</i> | <i>aggregatum</i>    | Lacistemataceae  | fruit               | edible |
| <i>Lecythis</i>  | <i>corrugata</i>     | Lecythidaceae    | seeds               | edible |
| <i>Lecythis</i>  | <i>pisonis</i>       | Lecythidaceae    | nut                 | edible |
| <i>Lecythis</i>  | <i>zabucajo</i>      | Lecythidaceae    | seeds               | edible |
| <i>Leersia</i>   | <i>hexandra</i>      | Poaceae          | seed                | edible |
| <i>Licania</i>   | <i>incana</i>        | Chrysobalanaceae | fruit               | edible |
| <i>Licaria</i>   | <i>puchury-major</i> | Lauraceae        | fruit used as spice | edible |
| <i>Licaria</i>   | <i>triandra</i>      | Lauraceae        | food flavoring      | edible |
| <i>Macoubea</i>  | <i>guianensis</i>    | Apocynaceae      | fruit               | edible |
| <i>Macoubea</i>  | <i>witotorum</i>     | Apocynaceae      | fruit               | edible |
| <i>Mammea</i>    | <i>americana</i>     | Clusiaceae       | fruit               | edible |
| <i>Manicaria</i> | <i>saccifera</i>     | Arecaceae        | fruit               | edible |
| <i>Manihot</i>   | <i>esculenta</i>     | Euphorbiaceae    | root                | edible |
| <i>Manilkara</i> | <i>bidentata</i>     | Sapotaceae       | fruit               | edible |
| <i>Manilkara</i> | <i>huberi</i>        | Sapotaceae       | fruit               | edible |



|                    |                       |                  |              |        |
|--------------------|-----------------------|------------------|--------------|--------|
| <i>Mansoa</i>      | <i>alliacea</i>       | Bignoniaceae     | condiment    | edible |
| <i>Maranta</i>     | <i>arundinacea</i>    | Marantaceae      | root         | edible |
| <i>Maranta</i>     | <i>ruiziana</i>       | Marantaceae      | root         | edible |
| <i>Matisia</i>     | <i>cordata</i>        | Malvaceae        | fruit        | edible |
| <i>Mauritia</i>    | <i>flexuosa</i>       | Arecaceae        | fruit        | edible |
| <i>Mauritiella</i> | <i>armata</i>         | Arecaceae        | fruit        | edible |
| <i>Mayna</i>       | <i>grandifolia</i>    | Flacourtiaceae   | fruit        | edible |
| <i>Melicoccus</i>  | <i>bijugatus</i>      | Sapindaceae      | fruit        | edible |
| <i>Melicoccus</i>  | <i>pedicellaris</i>   | Sapindaceae      | fruit        | edible |
| <i>Miconia</i>     | <i>ciliata</i>        | Melastomataceae  | fruit        | edible |
| <i>Miconia</i>     | <i>longifolia</i>     | Melastomataceae  | fruit        | edible |
| <i>Mouriri</i>     | <i>acutiflora</i>     | Melastomataceae  | fruit        | edible |
| <i>Mouriri</i>     | <i>crassifolia</i>    | Melastomataceae  | fruit        | edible |
| <i>Myrcia</i>      | <i>tomentosa</i>      | Myrtaceae        | fruit        | edible |
| <i>Myrciaria</i>   | <i>cauliflora</i>     | Myrtaceae        | fruit        | edible |
| <i>Oenocarpus</i>  | <i>bacaba</i>         | Arecaceae        | fruit        | edible |
| <i>Oenocarpus</i>  | <i>bataua</i>         | Arecaceae        | fruit        | edible |
| <i>Oenocarpus</i>  | <i>distichus</i>      | Arecaceae        | fruit        | edible |
| <i>Oenocarpus</i>  | <i>mapora</i>         | Arecaceae        | fruit        | edible |
| <i>Omphalea</i>    | <i>diandra</i>        | Euphorbiaceae    | seeds        | edible |
| <i>Ouratea</i>     | <i>parviflora</i>     | Ochnaceae        | fruit, oil   | edible |
| <i>Pachyrhizus</i> | <i>tuberosus</i>      | Fabaceae         | root         | edible |
| <i>Parinari</i>    | <i>campestris</i>     | Chrysobalanaceae | fruit, seeds | edible |
| <i>Parinari</i>    | <i>montana</i>        | Chrysobalanaceae | fruit, seeds | edible |
| <i>Passiflora</i>  | <i>edulis</i>         | Passifloraceae   | fruit        | edible |
| <i>Passiflora</i>  | <i>quadrangularis</i> | Passifloraceae   | fruit        | edible |

|                   |                      |               |             |        |
|-------------------|----------------------|---------------|-------------|--------|
| <i>Paullinia</i>  | <i>cupana</i>        | Sapindaceae   | stimulant   | edible |
| <i>Paullinia</i>  | <i>yoco</i>          | Sapindaceae   | stimulant   | edible |
| <i>Persea</i>     | <i>americana</i>     | Lauraceae     | fruit       | edible |
| <i>Phaseolus</i>  | <i>lunatus</i>       | Fabaceae      | seed        | edible |
| <i>Phaseolus</i>  | <i>vulgaris</i>      | Fabaceae      | seed        | edible |
| <i>Platonia</i>   | <i>insignis</i>      | Clusiaceae    | fruit, seed | edible |
| <i>Poraqueiba</i> | <i>paraensis</i>     | Icacinaceae   | fruit       | edible |
| <i>Poraqueiba</i> | <i>sericea</i>       | Icacinaceae   | fruit       | edible |
| <i>Posoqueria</i> | <i>longiflora</i>    | Rubiaceae     | fruit       | edible |
| <i>Poupartia</i>  | <i>amazonica</i>     | Anacardiaceae | fruit       | edible |
| <i>Pourouma</i>   | <i>cecropiifolia</i> | Urticaceae    | fruit       | edible |
| <i>Pourouma</i>   | <i>guianensis</i>    | Urticaceae    | fruit       | edible |
| <i>Pourouma</i>   | <i>mollis</i>        | Urticaceae    | fruit       | edible |
| <i>Pouteria</i>   | <i>caimito</i>       | Sapotaceae    | fruit       | edible |
| <i>Pouteria</i>   | <i>glomerata</i>     | Sapotaceae    | fruit       | edible |
| <i>Pouteria</i>   | <i>guianensis</i>    | Sapotaceae    | fruit       | edible |
| <i>Pouteria</i>   | <i>lucuma</i>        | Sapotaceae    | fruit       | edible |
| <i>Pouteria</i>   | <i>macrocarpa</i>    | Sapotaceae    | fruit       | edible |
| <i>Pouteria</i>   | <i>macrophylla</i>   | Sapotaceae    | fruit       | edible |
| <i>Pouteria</i>   | <i>multiflora</i>    | Sapotaceae    | fruit       | edible |
| <i>Pouteria</i>   | <i>obovata</i>       | Sapotaceae    | fruit       | edible |
| <i>Pouteria</i>   | <i>pariry</i>        | Sapotaceae    | fruit       | edible |
| <i>Pouteria</i>   | <i>procera</i>       | Sapotaceae    | fruit       | edible |
| <i>Pouteria</i>   | <i>ucuqui</i>        | Sapotaceae    | fruit       | edible |
| <i>Pouteria</i>   | <i>venosa</i>        | Sapotaceae    | fruit       | edible |
| <i>Protium</i>    | <i>heptaphyllum</i>  | Burseraceae   | fruit       | edible |

|                    |                       |               |           |        |
|--------------------|-----------------------|---------------|-----------|--------|
| <i>Protium</i>     | <i>unifoliolatum</i>  | Burseraceae   | fruit     | edible |
| <i>Psidium</i>     | <i>acutangulum</i>    | Myrtaceae     | fruit     | edible |
| <i>Psidium</i>     | <i>guajava</i>        | Myrtaceae     | fruit     | edible |
| <i>Psidium</i>     | <i>guineensis</i>     | Myrtaceae     | fruit     | edible |
| <i>Psidium</i>     | <i>sartorianum</i>    | Myrtaceae     | fruit     | edible |
| <i>Randia</i>      | <i>ruiziana</i>       | Rubiaceae     | fruit     | edible |
| <i>Rhynchoryza</i> | <i>subulata</i>       | Oryzeae       | grain     | edible |
| <i>Rollinia</i>    | <i>leptopetala</i>    | Annonaceae    | fruit     | edible |
| <i>Sagittaria</i>  | <i>latifolia</i>      | Alismataceae  | food      | edible |
| <i>Salacia</i>     | <i>impressifolia</i>  | Celastraceae  | fruit     | edible |
| <i>Sicana</i>      | <i>odorifera</i>      | Cucurbitaceae | vegetable | edible |
| <i>Siparuna</i>    | <i>guianensis</i>     | Monimiaceae   | fruit     | edible |
| <i>Solanum</i>     | <i>sessiliflorum</i>  | Solanaceae    | fruit     | edible |
| <i>Solanum</i>     | <i>splenden</i>       | Solanaceae    | fruit     | edible |
| <i>Solanum</i>     | <i>stramonifolium</i> | Solanaceae    | fruit     | edible |
| <i>Spilanthes</i>  | <i>acmella</i>        | Asteraceae    | condiment | edible |
| <i>Spilanthes</i>  | <i>oleracea</i>       | Asteraceae    | condiment | edible |
| <i>Spondias</i>    | <i>mombin</i>         | Anacardiaceae | fruit     | edible |
| <i>Sterculia</i>   | <i>apetala</i>        | Malvaceae     | seeds     | edible |
| <i>Sterculia</i>   | <i>excelsa</i>        | Malvaceae     | seeds     | edible |
| <i>Sterculia</i>   | <i>speciosa</i>       | Malvaceae     | fruit     | edible |
| <i>Syagrus</i>     | <i>cocoides</i>       | Arecaceae     | fruit     | edible |
| <i>Syagrus</i>     | <i>inajai</i>         | Arecaceae     | kernels   | edible |
| <i>Talinum</i>     | <i>triangulare</i>    | Portulacaceae | vegetable | edible |
| <i>Talisia</i>     | <i>esculenta</i>      | Sapindaceae   | fruit     | edible |
| <i>Tapirira</i>    | <i>guianensis</i>     | Anacardiaceae | fruit     | edible |

|                     |                      |             |              |        |
|---------------------|----------------------|-------------|--------------|--------|
| <i>Tetragastris</i> | <i>altissima</i>     | Burseraceae | fruit        | edible |
| <i>Theobroma</i>    | <i>bicolor</i>       | Malvaceae   | fruit, seed  | edible |
| <i>Theobroma</i>    | <i>cacao</i>         | Malvaceae   | stimulant    | edible |
| <i>Theobroma</i>    | <i>grandiflorum</i>  | Malvaceae   | fruit        | edible |
| <i>Theobroma</i>    | <i>microcarpum</i>   | Malvaceae   | fruit        | edible |
| <i>Theobroma</i>    | <i>speciosum</i>     | Malvaceae   | fruit        | edible |
| <i>Theobroma</i>    | <i>subincanum</i>    | Malvaceae   | fruit        | edible |
| <i>Vitex</i>        | <i>cymosa</i>        | Verbenaceae | fruit        | edible |
| <i>Vitex</i>        | <i>gigantea</i>      | Verbenaceae | fruit        | edible |
| <i>Vitex</i>        | <i>triflora</i>      | Verbenaceae | fruit        | edible |
| <i>Xanthosoma</i>   | <i>brasiliense</i>   | Araceae     | vegetable    | edible |
| <i>Xanthosoma</i>   | <i>sagittifolium</i> | Araceae     | root         | edible |
| <i>Ximenia</i>      | <i>americana</i>     | Olacaceae   | fruit, seeds | edible |
| <i>Zea</i>          | <i>mays</i>          | Poaceae     | grain        | edible |
| <i>Zizania</i>      | <i>palustris</i>     | Oryzeae     | grain        | edible |

Table S5. *Edible plant classifications used in this study*

| <b>Genus</b>            | <b>Family</b>  | <b>Edible</b> |
|-------------------------|----------------|---------------|
| <i>*Aphelandra</i>      | Acanthaceae    | no            |
| <i>*Amaranthus</i>      | Amaranthaceae  | no            |
| <i>Apiaceae</i>         | Apiaceae       | no            |
| <i>*Tabernaemontana</i> | Apocynaceae    | no            |
| <i>Dracontium</i>       | Araceae        | no            |
| <i>Dendropanax</i>      | Araliaceae     | no            |
| <i>Didymopanax</i>      | Araliaceae     | no            |
| <i>Oreopanax</i>        | Araliaceae     | no            |
| <i>*Schefflera</i>      | Araliaceae     | no            |
| <i>Geonoma</i>          | Arecaceae      | no            |
| <i>*Socratea</i>        | Arecaceae      | no            |
| <i>Ambrosia</i>         | Asteraceae     | no            |
| <i>*Alnus</i>           | Betulaceae     | no            |
| <i>Arrabidaea</i>       | Bignoniaceae   | no            |
| <i>*Jacaranda</i>       | Bignoniaceae   | no            |
| <i>*Lundia</i>          | Bignoniaceae   | no            |
| <i>Handroanthus</i>     | Bignoniaceae   | no            |
| <i>*Cocholospermum</i>  | Bixaceae       | no            |
| <i>*Cordia</i>          | Boraginaceae   | no            |
| <i>Symphonia</i>        | Clusiaceae     | no            |
| NA                      | Combretaceae   | no            |
| <i>Doliocarpus</i>      | Dilleniaceae   | no            |
| NA                      | Elaeocarpaceae | no            |
| <i>Acalypha</i>         | Euphorbiaceae  | no            |
| <i>Alchornea</i>        | Euphorbiaceae  | no            |

|                       |                  |    |
|-----------------------|------------------|----|
| <i>*Croton</i>        | Euphorbiaceae    | no |
| <i>*Mabea</i>         | Euphorbiaceae    | no |
| <i>*Phyllanthus</i>   | Euphorbiaceae    | no |
| <i>Sapium</i>         | Euphorbiaceae    | no |
| <i>*Sebastiana</i>    | Euphorbiaceae    | no |
| <i>*Acacia</i>        | Fabaceae         | no |
| <i>*Anadenanthera</i> | Fabaceae         | no |
| <i>Apuleia</i>        | Fabaceae         | no |
| <i>Bauhinia</i>       | Fabaceae         | no |
| <i>Bowdichia</i>      | Fabaceae         | no |
| <i>*Centrolobium</i>  | Fabaceae         | no |
| <i>*Chamaecrista</i>  | Fabaceae         | no |
| <i>Dalbergia</i>      | Fabaceae         | no |
| <i>*Desmodium</i>     | Fabaceae         | no |
| <i>*Hymenea</i>       | Fabaceae         | no |
| <i>Machaerium</i>     | Fabaceae         | no |
| <i>*Macrolobium</i>   | Fabaceae         | no |
| <i>*Mimosa</i>        | Fabaceae         | no |
| <i>Ormosia</i>        | Fabaceae         | no |
| <i>Pterogyne</i>      | Fabaceae         | no |
| <i>*Senna</i>         | Fabaceae         | no |
| <i>*Swartzia</i>      | Fabaceae         | no |
| NA                    | Flacourtiaceae   | no |
| <i>Episcia</i>        | Gesneriaceae     | no |
| <i>*Vantanea</i>      | Humiriaceae      | no |
| <i>*NA</i>            | Hymenophyllaceae | no |

|                      |                  |    |
|----------------------|------------------|----|
| <i>*Lereticia</i>    | Icacinaceae      | no |
| NA                   | Lamiaceae        | no |
| <i>Utricularia</i>   | Lentibulariaceae | no |
| <i>*Heteropteris</i> | Malpighiaceae    | no |
| <i>*Ceiba</i>        | Malvaceae        | no |
| *NA                  | Malvaceae        | no |
| <i>Pseudobombax</i>  | Malvaceae        | no |
| <i>*Cedrela</i>      | Meliaceae        | no |
| NA                   | Meliaceae        | no |
| <i>*Ruagea</i>       | Meliaceae        | no |
| NA                   | Moraceae         | no |
| <i>*Pseudolmedia</i> | Moraceae         | no |
| <i>*Sorocea</i>      | Moraceae         | no |
| <i>*Stylogene</i>    | Myrsinaceae      | no |
| *NA                  | Myristicaceae    | no |
| <i>Virola</i>        | Myristicaceae    | no |
| <i>*Myrsine</i>      | Myrsinaceae      | no |
| <i>*Podocarpus</i>   | Podocarpaceae    | no |
| <i>*Polygala</i>     | Polygalaceae     | no |
| <i>*Polygalaceae</i> | Polygalaceae     | no |
| <i>*Polygonum</i>    | Polygalaceae     | no |
| <i>*Gouania</i>      | Rhamnaceae       | no |
| *NA                  | Rhizophoraceae   | no |
| <i>*Borreria</i>     | Rubiaceae        | no |
| <i>Psychotria</i>    | Rubiaceae        | no |
| <i>*Spermacoce</i>   | Rubiaceae        | no |

|                  |               |    |
|------------------|---------------|----|
| *NA              | Rutaceae      | no |
| <i>Simarouba</i> | Simaroubaceae | no |
| * <i>Luehea</i>  | Tiliaceae     | no |
| * <i>Typha</i>   | Typhaceae     | no |
| * <i>Trema</i>   | Ulmaceae      | No |

Table S6. *Pollen taxa identified in this study with no documented edible Genus.*\*Indicates pollen less than 5% and not included in pollen diagram.



| <b>Pollen Taxa</b> | <b>Family</b>   | <b>Putative Edible</b>                                                       | <b>Type of food</b>   |
|--------------------|-----------------|------------------------------------------------------------------------------|-----------------------|
| Acanthaceae        | Acanthaceae     | <i>Justicia</i> spp.                                                         | stimulant             |
| Agavaceae          | Agavaceae       | <i>Agave</i> spp.                                                            | beverage              |
| Apiaceae           | Apiaceae        | <i>Eryngium</i> spp.                                                         | flavoring, vegetables |
| Apocynaceae        | Apocynaceae     | <i>Ambelania</i> sp.                                                         | fruit                 |
| Asteraceae         | Asteraceae      | <i>Eupatorium</i> sp.                                                        | condiment             |
| Bignoniaceae       | Bignoniaceae    | <i>Mansoa</i> sp.                                                            | condiment             |
| Cyperaceae         | Cyperaceae      | <i>Cyperus</i>                                                               | condiment             |
| Lecythidaceae      | Lecythidaceae   | <i>Lecythis pisonis</i>                                                      | seed                  |
| Malvaceae          | Malvaceae       | <i>Sterculia apetala</i>                                                     | seed                  |
| Marantaceae        | Marantaceae     | <i>Maranta arundinacea</i> , <i>M. ruiziana</i>                              | root                  |
| Myrtaceae          | Myrtaceae       | <i>Campomanesia</i>                                                          | fruit                 |
| Melastomataceae    | Melastomataceae | <i>Bellucia grossularioides</i>                                              | fruit                 |
| Poaceae            | Poaceae         | <i>Leersia</i> , <i>Pharus</i> , <i>Oryzae glumaepatula</i> , <i>O. alta</i> | grain                 |
| Sapindaceae        | Sapindaceae     | <i>Melicoccus</i>                                                            | fruit                 |
| Sapindaceae        | Sapindaceae     | <i>Talisia</i> sp.                                                           | fruit                 |
| Solanaceae         | Solanaceae      | <i>Capsicum</i> sp.                                                          | condiment, spice      |

Table S7. Pollen taxa identified in this study identified to family level with known edible genus.

| <b>Pollen Taxa</b>     | <b>Family</b> | <b>Putative Edible</b>                                           | <b>Common name</b>            | <b>Type of food</b> |
|------------------------|---------------|------------------------------------------------------------------|-------------------------------|---------------------|
| <i>Sagittaria</i>      | Alismataceae  | <i>S. latifolia</i>                                              | Arrowhead                     | food                |
| <i>Tapiria</i> +       | Anacardiaceae | <i>T. guianensis</i>                                             | Wild mahogany                 | fruit               |
| <i>Spondias</i> +*     | Anacardiaceae | <i>S. mombin</i>                                                 | Hog plum,<br>taperibá         | fruit               |
| <i>Annona</i> +*       | Annonaceae    | <i>A. mucosa</i> , <i>A. muricata</i>                            | Wild custard<br>apple, biribá | fruit               |
| <i>Ilex</i>            | Aquifoliaceae | <i>I. guayusa</i>                                                | Brazilian tea, mate           | stimulant           |
| <i>Acrocomia</i> +*    | Arecaceae     | <i>A. aculeata</i>                                               | Mucajá, macaúba               | fruit               |
| <i>Astrocaryum</i> +*  | Arecaceae     | <i>A. vulgare</i> , <i>A. aculeatum</i>                          | Cumare palm,<br>tucumã        | fruit               |
| <i>Attalea</i> +*      | Arecaceae     | <i>A. speciosa</i>                                               | Babassu palm,<br>babaçu       | fruit, oil          |
| <i>Bactris</i> *       | Arecaceae     | <i>B. guineensis</i> ,<br><i>B. gasipaes</i>                     | Peach palm,<br>pupunha        | fruit               |
| <i>Mauritia</i> +      | Arecaceae     | <i>M. flexuosa</i>                                               | Buruti palm, burití           | fruit               |
| <i>Mauritiella</i> +   | Arecaceae     | <i>M. carana</i>                                                 | Caraná, caranai               | fruit               |
| <i>Oenocarpus</i> +    | Arecaceae     | <i>O. distichus</i>                                              | Bacaba                        | fruit               |
| <i>Protium</i> +       | Burseraceae   | <i>P. unifoliolatum</i> ,<br><i>P. heptaphyllum</i>              | Breu, ràb kudjà re            | fruit               |
| <i>Tetragastris</i> +* | Burseraceae   | <i>T. altissima</i>                                              | Haiawa balli,<br>ràb ti       | fruit               |
| <i>Celtis</i> +        | Cannabaceae   | <i>C. iguanaea</i>                                               | Garabato blanco               | fruit               |
| <i>Jacaratia</i> +*    | Caricaceae    | <i>J. spinosa</i>                                                | Barrigudo, mamoi              | fruit               |
| <i>Caryocar</i> +      | Caryocaraceae | <i>C. villosum</i> , <i>C. glabum</i> ,<br><i>C. microcarpum</i> | Butternut tree,<br>pequiá     | fruit               |

|                        |                  |                                                                   |                               |               |
|------------------------|------------------|-------------------------------------------------------------------|-------------------------------|---------------|
| <i>Licania</i> +       | Chrysobalanaceae | <i>Licania</i> spp.                                               | Gopher apple, ajaru           | fruit         |
| <i>Garcinia</i>        | Clusiaceae       | <i>G. brasiliensis</i> ,<br><i>G. gardneriana</i>                 | Bacupari                      | fruit         |
| <i>Erythroxylum</i>    | Erythroxylaceae  | <i>E. coca</i>                                                    | Coca                          | stimulant     |
| <i>Hevea</i> +*        | Euphorbiaceae    | <i>H. brasiliensis</i>                                            | Para rubber tree, seringueira | seed          |
| <i>Cassia</i>          | Fabaceae         | <i>C. leiandra</i>                                                | Marimari                      | fruit         |
| <i>Dialium</i> +*      | Fabaceae         | <i>D. guianense</i>                                               | Jutaí pororoca                | fruit         |
| <i>Dipteryx</i> + *    | Fabaceae         | <i>D. odorata</i>                                                 | Tonka beans, cumarú           | fruit         |
| <i>Inga</i> +*         | Fabaceae         | <i>I. alba</i> , <i>I. edulis</i> ,<br><i>I. laurina</i>          | Icecream bean, ingá cipo      | fruit         |
| <i>Hymenaea</i> +      | Fabaceae         | <i>H. courbaril</i>                                               | Anime resin tree, jatobá      | fruit         |
| <i>Heliconia</i> +*    | Heliconiaceae    | <i>H. hirsuta</i>                                                 | Bico de papagaio              | root          |
| <i>Humiria</i>         | Humiriaceae      | <i>Humiria</i> sp.                                                | Blackberry, umiri             | fruit         |
| <i>Aniba</i> +         | Lauraceae        | <i>A. rosaeodora</i>                                              | Brazilian rosewood, páo rosa  | food additive |
| <i>Bertholletia</i> +* | Lecythidaceae    | <i>B. excelsa</i>                                                 | Brazil nut, castanha do Pará  | edible nut    |
| <i>Eschweilera</i> +   | Lecythidaceae    | <i>E. coriacea</i> ,<br><i>E. grandiflora</i>                     | Matamatá branco               | seeds         |
| <i>Byrsonima</i> +     | Malpighiaceae    | <i>B. crassifolia</i> ,<br><i>B. verbascifolia</i>                | Golden spoon, murici          | fruit         |
| <i>Theobroma</i> +     | Malvaceae        | <i>T. cacao</i> , <i>T. grandiflorum</i> ,<br><i>T. speciosum</i> | Cacao tree, cacau, cupuaçu    | fruit         |

|                                 |              |                                                                                  |                               |            |
|---------------------------------|--------------|----------------------------------------------------------------------------------|-------------------------------|------------|
| <i>Brosimum</i> <sup>+</sup>    | Moraceae     | <i>B. lactescens</i> ,<br><i>B. alicastrum</i>                                   | Breadnut tree,<br>mauratinga  | edible nut |
| <i>Pourouma</i>                 | Urticaceae   | <i>P. cecropiifolia</i><br><i>P. guianensis</i> , <i>P. edulis</i>               | Amazon grape<br>fruit, mapati | fruit      |
| <i>Coccoloba</i> <sup>+</sup> * | Polygonaceae | <i>C. latifolia</i>                                                              | Papalón                       | fruit      |
| <i>Paullinia</i>                | Sapindaceae  | <i>P. cupana</i>                                                                 | Guaraná                       | stimulant  |
| <i>Pouteria</i> <sup>+</sup>    | Sapotaceae   | <i>P. glomerata</i> , <i>P. venosa</i> ,<br><i>P. caimito</i> , <i>P. lucuma</i> | Egg fruit, abiu               | fruit      |
| <i>Solanum</i> <sup>+</sup>     | Solanaceae   | <i>S. sessiliflorum</i> ,<br><i>S. splendens</i>                                 | Orinoco apple,<br>cocona      | fruit      |
| <i>Cecropia</i> <sup>+</sup>    | Urticaceae   | <i>C. peltata</i>                                                                | Trumpet tree,<br>embaúba      | fruit      |

Table S8. *Pollen taxa identified to family level with known edible genus in ethnographic record and present in modern botanical inventory.* + indicates genera identified in the pollen record that are present in the modern botanical inventories and the botanical reconnaissance around Lake Caranã. \* indicates pollen less than 5% and not included in edible sums with the exception of crop pollen which is presented as presence data.

**Phytolith Taxa****Family/Taxonomic association**

---

|                        |                  |
|------------------------|------------------|
| Mendoncia sp.          | Acanthaceae      |
| Annonaceae             | Annonaceae       |
| Arboreal               | Arboreal         |
| Asteraceae             | Asteraceae       |
| Bamboosoideae          | Bamboosoideae    |
| Cyperaceae             | Cyperaceae       |
| Commelinaceae          | Commelinaceae    |
| Heliconiaceae          | Heliconiaceae    |
| <i>Trichomanes</i> sp. | Hymenophyllaceae |
| Marantaceae            | Marantaceae      |
| Chloridoideae          | Poaceae          |
| Poaceae                | Poaceae          |

**Table S9.** *Phytolith taxa identified in this study.*

---

| Phytolith taxa      | Taxonomic association | Putatable edible                                         | Common name                | Type of food |
|---------------------|-----------------------|----------------------------------------------------------|----------------------------|--------------|
| Arecaceae+          | Arecaceae             | Various incl. <i>Astrocaryum</i> , <i>Attalea</i> , etc. | Various                    | fruit        |
| Olyreae             | Bamboosoideae         | Various incl. <i>O. latifolia</i>                        | takwari<br>(Ka'apor tribe) | grain        |
| <i>Celtis</i> sp.+  | Cannabaceae           | Various incl. <i>C. iguanaea</i> , <i>C. morifolia</i>   | Parinari                   | fruit        |
| <i>Chusquea</i> sp. | Poaceae               | <i>C. culeou</i>                                         | Culeu                      | grain        |
| <i>Pharus</i> sp.   | Poaceae               | <i>P. ciliatus</i>                                       | Arroz bravo                | seed         |

**Table S10.** *Edible phytolith taxa identified in this study.* + indicates genera identified in the pollen record that are present in the modern botanical inventories and the botanical reconnaissance around Lake Caranã.

## Supplementary Discussion

*D1. Riverine high-stand.* Although the region has a long record of human occupation that starts in the Late Pleistocene, our records detect the history of coupled human and environmental systems for the past ~ 5,500 years. Relative sea-level rise was ongoing throughout the early Holocene along the east coast of South America<sup>17</sup>, culminating in a high-stand between ~ 5,700 and 5,100 cal B.P.<sup>18–20</sup>. Because the base of the river channel in the eastern half of the Amazon basin is near to sea-level (<2 m), relative sea-level rise would have resulted in a deeper inland penetration of the Atlantic tidal zone, in part damming the flow of the large rivers that drain into the lower reaches of the Amazon<sup>19</sup>. For the tidally influenced Tapajós River, higher sea-levels results in higher river levels, which likely inundated the LC study-area (Fig. 4a). Increased water levels account for the peak Fe, Ti, MS, and bulk density values during this phase. Decreasing relative sea-level and river inundation (~ 5,000 to 4,000 cal B.P.) caused numerous lakes to form in the lower Amazon<sup>10,20</sup>. This process is evidenced by a mix of terrestrial and hydrarch succession and is reflected in the Tapajós TAP-02 riverine pollen core<sup>20</sup> and other records in the Amazon<sup>18,21</sup>.

LC Phase 1 is characterized by the highest levels of Ti and Fe coupled with record high magnetic susceptibility (MS) and bulk density values. Ca levels were below the level of detection, thus ratios for Ti/Ca and F/Ca could not be calculated. Coupled with MS and bulk density, geochemistry from LC Phase 2 indicates decreased Fe, Ti, bulk density and MS values, coupled with an increase in bulk sediment organic content indicating a shift to lacustrine conditions signaling the formation of the lake (Supplementary Fig. S2).

*D2. Archaeology.* The earliest known archaeological evidence in the Lower Amazon is the Palaeoindian occupation of Pedra Pintada Cave (~ 13,000 cal B.P.)<sup>22</sup>. Archaic occupations in the region are represented by the Taperinha shell-midden, which contains the earliest ceramics in the Amazon (~ 7,900 cal B.P.)<sup>23</sup>. The Formative Period occurs between ~ 4500 and 1000 cal B.P.<sup>24</sup> followed by the Late pre-Columbian Tapajo Period (LPTP) from ~ 1000 to 400 cal B.P.<sup>25</sup>. The LPTP is a distinctive Amazonian tradition characterized by elaborate pottery vessels typically decorated with representational and geometric plastic and painted designs, anthropomorphic and zoomorphic adornos displayed in caryatid and neck vessels, as well as polished-stone figurines representing various animals and humans locally called “muiraquitas”<sup>26,27</sup>. Roosevelt<sup>28</sup> argues for a chiefdom-level society, which may have control over a territory of 23 km<sup>2</sup> with densely populated settlements encompassing a population of several thousand, whose capital site of the LPTP lies at the confluence of the Tapajós and the Amazon River. However, recent regional studies propose heterarchical models of political organization, either supporting the hypothesis of a centralized organization encompassing independent communities<sup>29</sup> or a non-centralized polity based on a collaborative network integrating the region<sup>13,30</sup>.

The sum of probability distributions of the available radiocarbon dates from the Santarém region and its surroundings (Fig. 2D) provide a unique setting to understand the origin, development and agricultural use of ADEs. The area exhibits some of the highest densities of ADE sites<sup>14</sup>, including Black ADEs and Brown ADEs (traditionally known as *terra preta* and *terra mulata*), located in a diversity of settings

along both major waterways (Tapajós and Amazon rivers) and in *terra firme* rainforest along the Belterra Plateau (130 to 180 m.a.s.l.)<sup>26,31,32</sup> (Fig. 1A). The word *mulata* has a pejorative meaning of miscegenation and impurity. *Mulata* refers to interethnic breeding that resulted largely from rapes during the 354 years (1534 to 1888 A.D.) of black slavery in Brazil<sup>33–35</sup>. Considering the etymology of the word, the ethical choice of this work is to refuse the nomenclature *terras mulatas* as a category of classification of the lighter form of dark soils. Thus, the terminologies adopted in this study are Black ADE and Brown ADE. While Black ADEs developed as the result of village middens, the lighter Brown ADEs, devoid of artifacts are the result of cultivation practices<sup>31,36</sup>. The earliest ADE site is from Lago do Jacare I, located in the bluff of a *terra firme* lake dated from ~ 4405 to 3920 cal B.P.<sup>12</sup>. Riverine ADEs date to as early as ~ 4295 to 3990 cal B.P. and ADEs on the BTP are later dating from ~ 555 to 500 cal B.P. and represent the more recent intensification of human occupation on the plateau. The regional intensification begins ~ 1500 cal B.P. and peaks ~ 500 cal B.P. (Fig. 2D). The LPTP is also characterized by a network of ditch and causeway trails and natural ponds, which have been artificially enhanced as reservoirs. Our study site, Serra do Maguari 1 (SDM1) is a ~ 15 ha mounded village with a central plaza surrounded by a mosaic of ADE sites (Supplementary Fig. S4). Mound construction and ADE formation at SDM1 occurred between ~ 530 and 450 cal B.P. during the late phase of the LPTP. The ceramic materials and the site are characteristic of the late pre-Columbian Tapajós Period<sup>37</sup>.



## Supplementary Figures

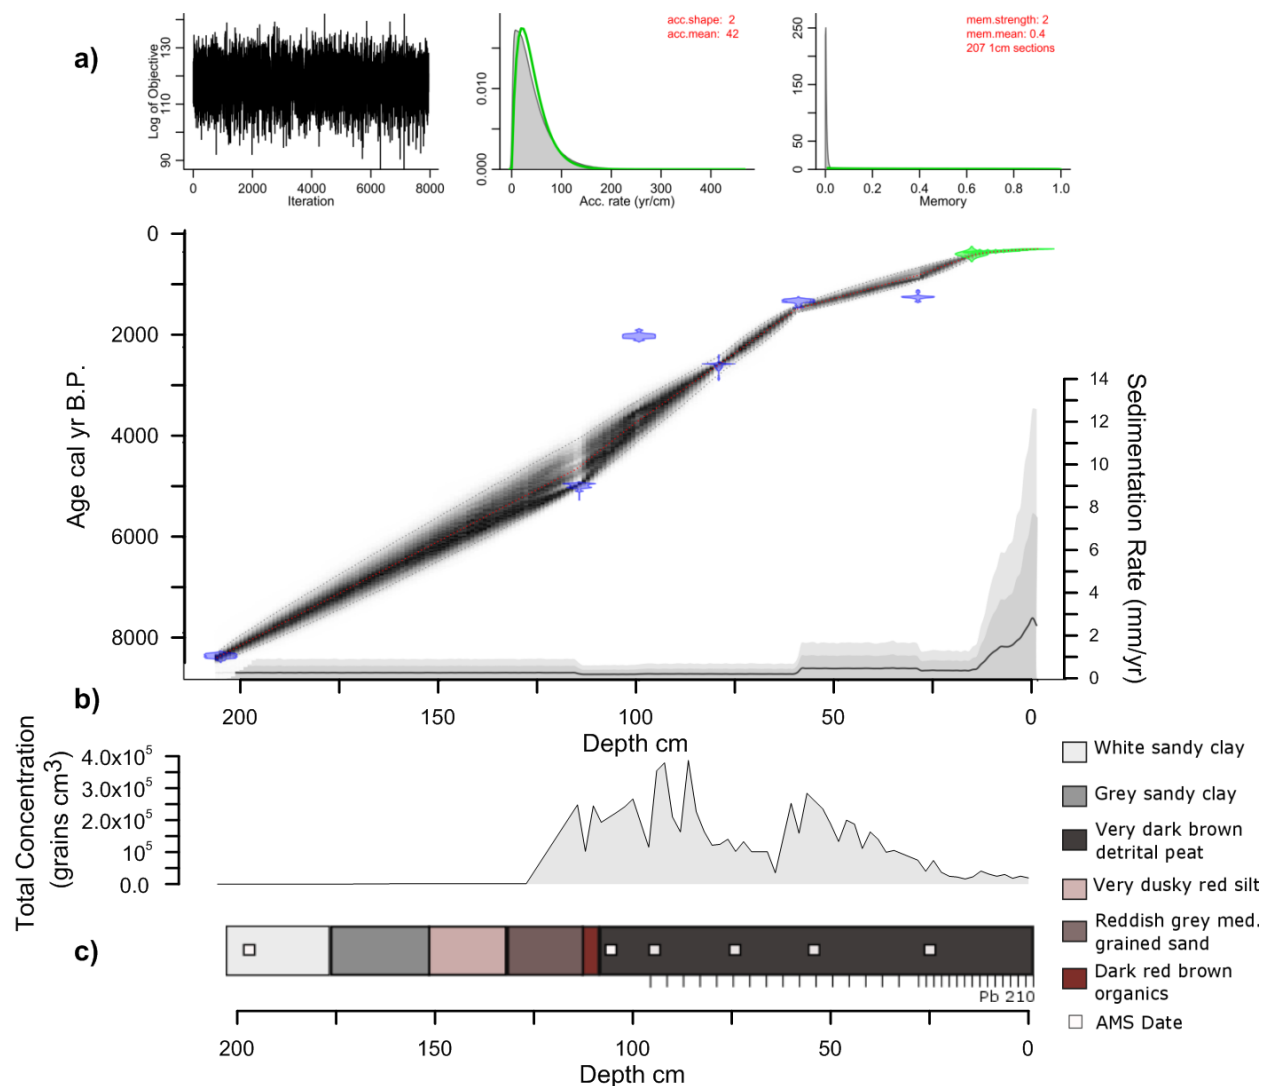

**Fig. S1. Lake Caranã age-model.** a) Age-depth model with MCMC iterations (top left) and priors (green curves) and posteriors (grey histograms) for accumulation rate (top middle) and memory (top right). The age model iterations (black hatching) are based on radiocarbon ages (blue pdfs) and  $^{210}\text{Pb}$  ages (green pdfs), with model mean (red dashed) and  $2\sigma$  (black dashed) distributions. b) Total pollen concentration from sediment core. c) Sediment core lithology. AMS dates indicated by the white squares,  $^{210}\text{Pb}$  indicated by tick marks. Note: Low pollen concentration prior to ~4,700 cal yr B.P. is attributed to a combination of sandy sediments and low organics that likely reduced pollen preservation.

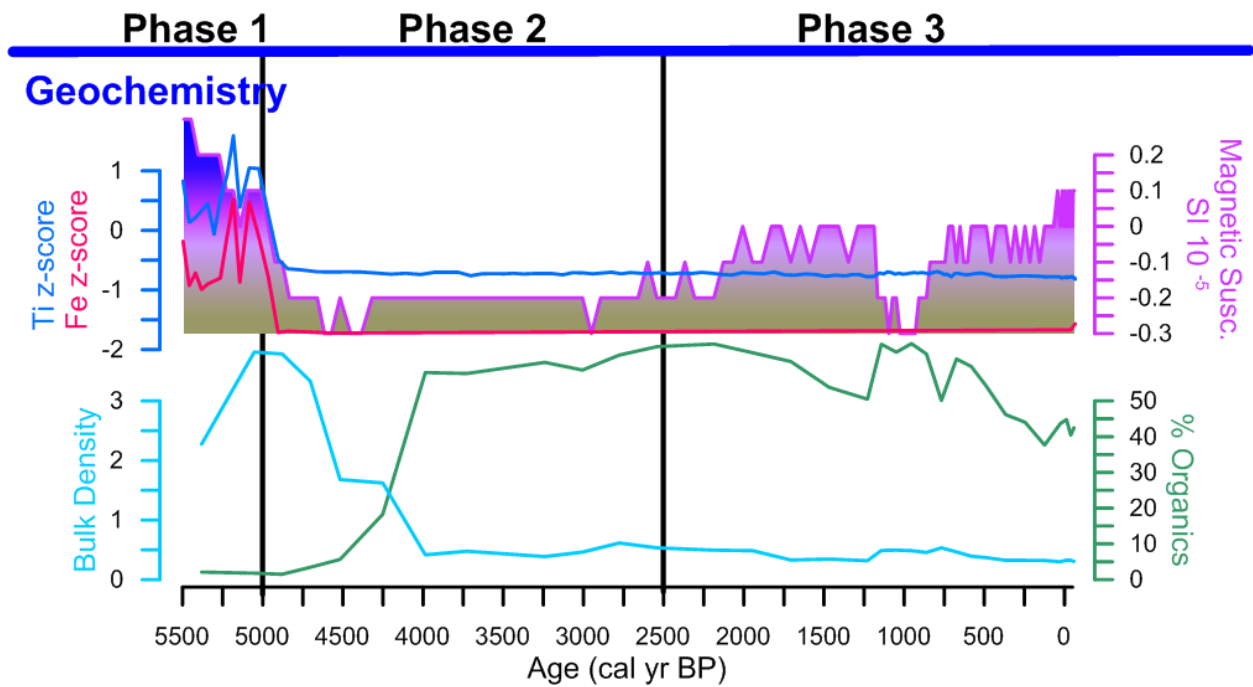

**Fig. S2. Lake Caranã geochemistry.** Z-score Ti (blue) and Fe (pink) XRF data. Magnetic susceptibility (purple) is represented in  $SI^{10^{-5}}$ , bulk density (teal) and % organics from loss-on-ignition (green) indicated the transition from organic poor to organic rich lacustrine conditions between Phase 1 and Phase 2.



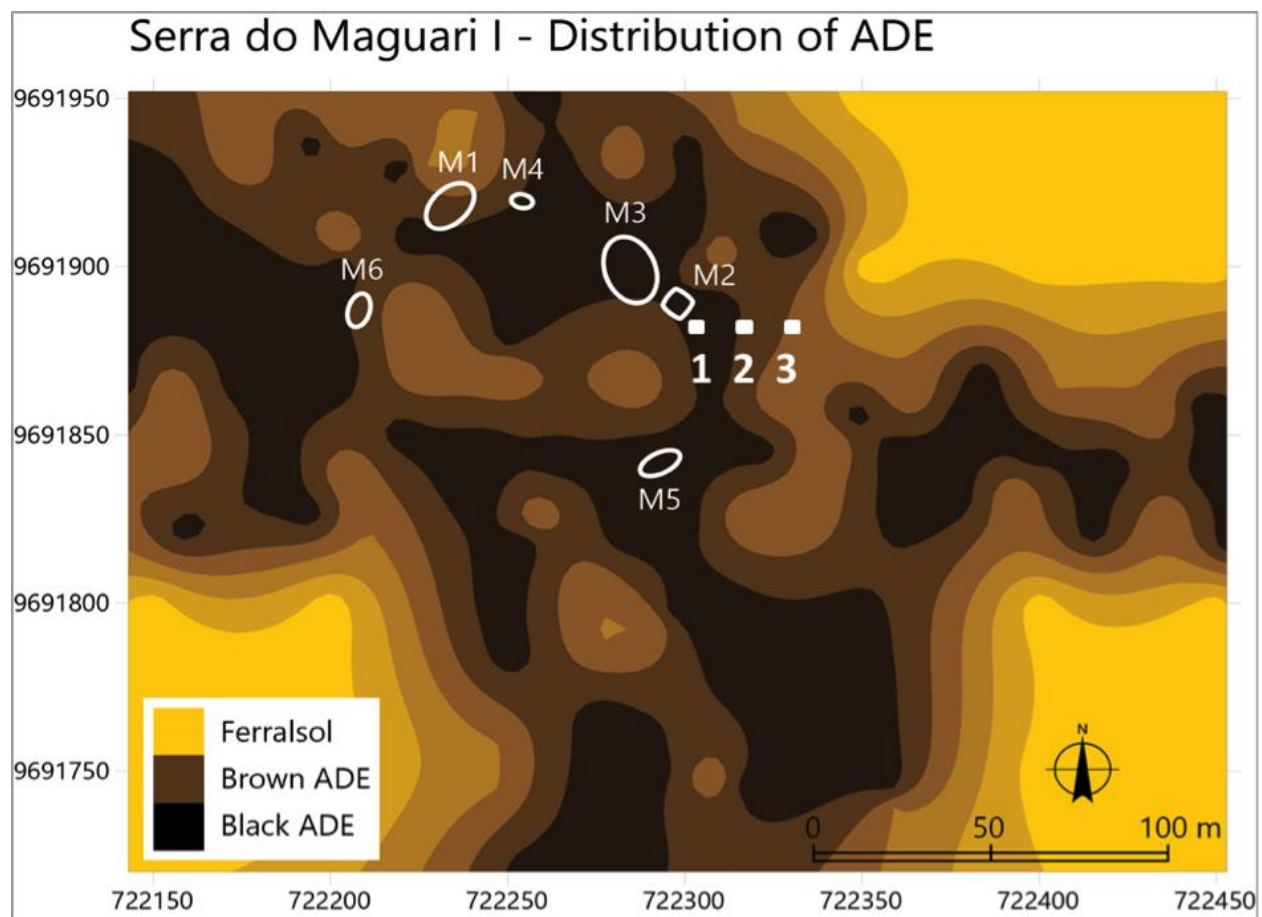

**Fig. S4. Serra do Maguari-1 site map.** ADE-ferralsol distribution map at Serra do Maguari-1. White circles indicate archaeological mound features (M1-6). Soil profile locations indicated by white squares (1-3).

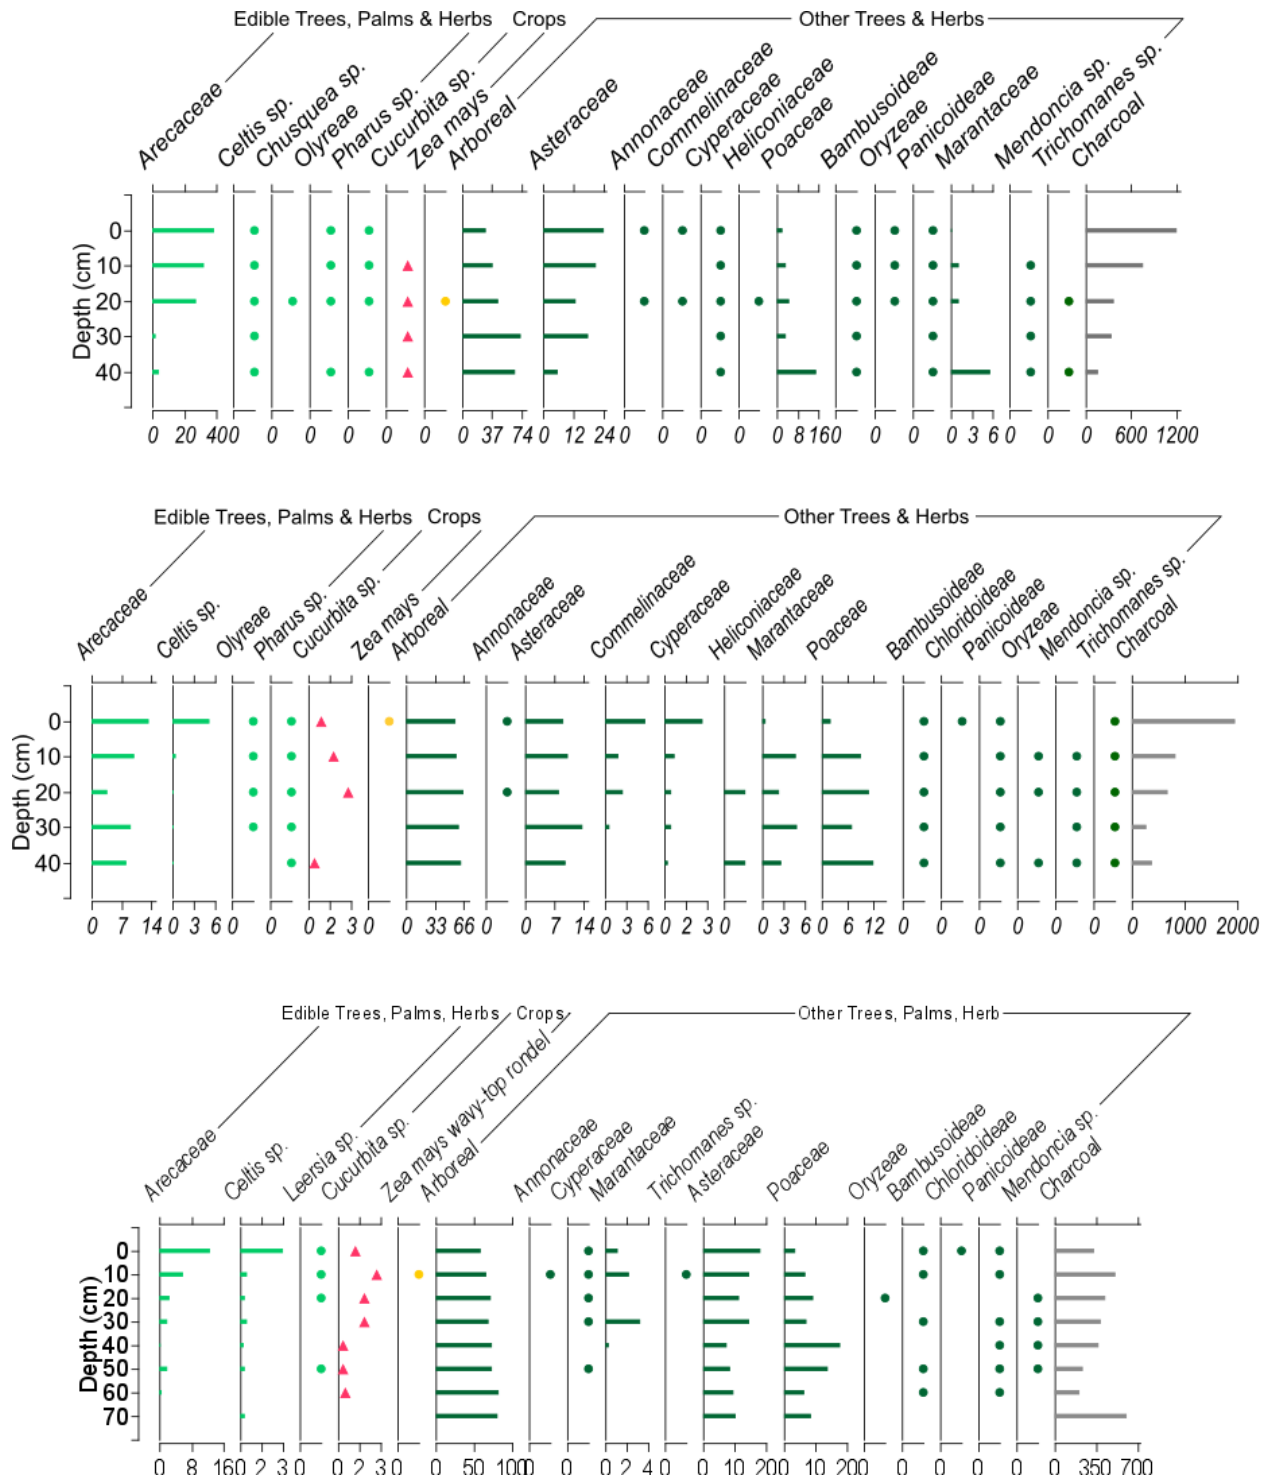

**Fig. S5. Serra do Maguari phytolith soil profiles.** Phytolith percentage diagrams from soils profiles (SP). Symbols represent total counts where percentage data were very low. Light green represents edible plants, dark green represents other trees and herbs. Light green circles represent total counts for edible plants, dark green circles indicate total counts of other trees and herbs, pink triangles indicate *Cucurbita* and yellow circle indicate *Zea mays*. Total soil charcoal counts grey bars.

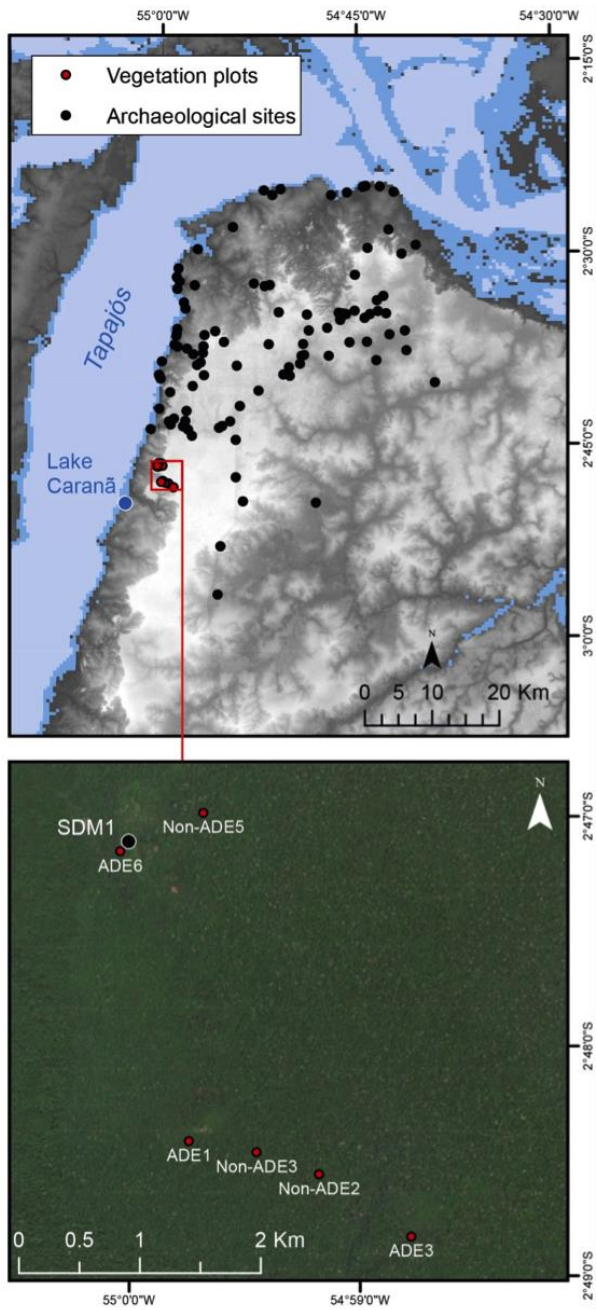

**Fig. S6 Map of modern vegetation plots:** Top panel indicating the location of vegetation plots in relation to Lake Caranã, Serra do Maguari, and other archaeological sites. Bottom insert indicates the location of ADE and non-ADE plots used in the modern vegetation survey in relation to Serra do Maguari.

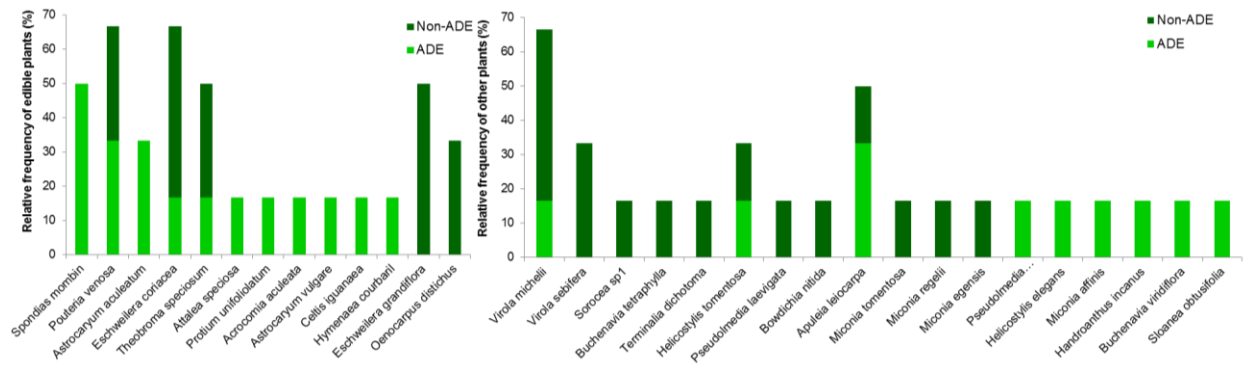

**Fig. S7. Relative frequency of modern vegetation inventories:** Relative frequency (%) of edible and other trees, palms, and lianas identified in ADE (light green) and non-ADE (dark green) forest plots.



## Supplementary References

1. Athens, S. J. *et al.* Early Prehistoric Maize in Northern Highland Ecuador. *Lat. Am. Antiq.* **27**, 3–21 (2016).
2. Bush, M. B., Dolores, R. P. & Colinvaux, P. A. A 6,000 year history of Amazonian maize cultivation. *Nature* **340**, 303–305 (1989).
3. Bush, M. B. *et al.* A 6900-year history of landscape modification by humans in lowland Amazonia. *Quat. Sci. Rev.* **141**, 52–64 (2016).
4. Mora, S., Herrera, L. F., Cavalier, I. & Rodríguez, C. *Cultivars, anthropic soils, and stability: a preliminary report of archaeological research in Araracuara, Colombian Amazonia.* (1991).
5. Sublette Mosblech, N. A., Chepstow-Lusty, A., Valencia, B. G. & Bush, M. B. Anthropogenic control of late-Holocene landscapes in the Cuzco region, Peru. *The Holocene* **22**, 1361–1372 (2012).
6. Bush, M. B. *et al.* Holocene fire and occupation in Amazonia: Records from two lake districts. *Philos. Trans. R. Soc. Lond. B. Biol. Sci.* **362**, 209–18 (2007).
7. Brugger, S. O. *et al.* Long-term man–environment interactions in the Bolivian Amazon: 8000 years of vegetation dynamics. *Quat. Sci. Rev.* **132**, 114–128 (2016).
8. Roosevelt, A. C. *Parmana: prehistoric maize and manioc subsistence along the Amazon and Orinoco.* (Academic Press, 1980).
9. Hilbert, L. *et al.* Evidence for mid-Holocene rice domestication in the Americas. *Nat. Ecol. Evol.* **1**, 1693–1698 (2017).
10. Bush, M. B., Miller, M. C., Oliveira, P. E. De & Colinvaux, P. A. Two histories of environmental change and human disturbance in eastern lowland Amazonia. **5**, 543–553 (2000).
11. Gomes, D. C. Cronologia e conexões culturais na Amazônia: as sociedades formativas na região de Santarém, PA. *Rev. Antropol.* **54**, 268–314 (2011).
12. Alves, D. T. Ocupação Indígena na Foz do Rio Tapajós (1610 a.a. - 1020 d.c.). *Novas Edições Acadêmicas, Saarbrücken* 245 (2014).
13. Quinn, E. R. Excavating “Tapajó” ceramics at Santarém: Their age and archaeological context. *Unpubl. Dr. Thesis, Univ. Illinois Chicago, Chicago.*[Links] (2004).
14. Martins, C. M. P. Sobre contatos e fronteiras: Um enfoque arqueológico. *Amaz. - Rev. Antropol.* **4**, (2012).
15. Schaan, D. P. *Discussing centre-periphery relations within the Tapajó domain, Lower Amazon. Beyond Waters: Archaeology and Environmental History of the Amazonian Inland* (GOTARC (Gothenburg Archaeological Studies), Series A University of Gothenberg, 2016).
16. Stenborg, P. *Archaeological research at hinterland sites on the Belterra Plateau, Pará. Beyond Waters: Archaeology and Environmental History of the Amazonian Inland* (GOTARC (Gothenburg Archaeological Studies), Series A University of Gothenberg, 2016).
17. Milne, G. A., Long, A. J. & Bassett, S. E. Modelling Holocene relative sea-level observations from the Caribbean and South America. *Quat. Sci. Rev.* **24**, 1183–1202 (2005).
18. Behling, H., Keim, G., Irion, G., Junk, W. & Mello, J. N. De. Holocene environmental changes in the Central Amazon Basin inferred from Lago Calado (Brazil). *Palaeogeogr. Palaeoclimatology, Palaeoecol.* **173**, 87–101 (2001).
19. Angulo, R. J., Lessa, G. C. & Souza, M. C. de. A critical review of mid- to late-Holocene sea-level fluctuations on the eastern Brazilian coastline. *Quat. Sci. Rev.* **25**, 486–506 (2006).
20. Irion, G. *et al.* A multiproxy palaeoecological record of Holocene lake sediments from the Rio Tapajós, eastern Amazonia. *Palaeogeogr. Palaeoclimatol. Palaeoecol.* **240**, 523–535 (2006).
21. Weng, C., Bush, M. B. & Athens, J. S. Holocene climate change and hydrarch succession in lowland Amazonian Ecuador. *Rev. Palaeobot. Palynol.* **120**, 73–90 (2002).
22. Roosevelt, A. C. *et al.* Paleoindian cave dwellers in the Amazon: the peopling of the Americas. *Science.* **272**, 373–384 (1996).
23. Roosevelt, A. C., Housley, R. A., Da Silveira, M. I., Maranca, S. & Johnson, R. Eighth millennium pottery from a prehistoric shell midden in the Brazilian Amazon. *Science.* **254**, 1621–



- 1624 (1991).
24. Schaan, D. Long-term human induced impacts on Marajó Island landscapes, Amazon estuary. *Diversity* **2**, 182–206 (2010).
  25. Stenborg, P., Schaan, D. P. & Lima, M. A. Precolumbian land use and settlement pattern in the Santarém region, lower Amazon. *Amazônica* **4**, 222–250 (2012).
  26. Nimuendajú, C. *In pursuit of a past Amazon: archaeological researches in the Brazilian Guyana and in the Amazon region*. (Elanders Infologistik, 2004).
  27. Palmatary, H. C. *The archaeology of the lower Tapajós Valley, Brazil*. **50**, (American Philosophical Society, 1960).
  28. Roosevelt, A. C. *Arqueologia Amazônica. História dos índios no Brasil*. (FAPESP, São Paulo, 1992).
  29. Gomes, D. M. C. Politics and ritual in large villages in Santarém, lower Amazon, Brazil. *Cambridge Archaeol. J.* **27**, 275–293 (2017).
  30. Troufflard, J. A Reflection on Archaeology and Sustainability in the Brazilian Amazon. in *The 3rd World Sustainability Forum* 1–12 (2013).
  31. Sombroek, W. G. *Amazon soils*. (Centre for agricultural publications and documentation Wageningen, 1966).
  32. Woods, W. I. & McCann, J. M. The anthropogenic origin and persistence of Amazonian dark earths. in *Yearbook. Conference of latin americanist Geographers* 7–14 (JSTOR, 1999).
  33. Caldwell, K. I. A. L. *Negras in Brazil*. (Rutgers University Press, 2007). at <<http://www.jstor.org/stable/j.ctt5hhwqb>>
  34. Carneiro, S. in *Race in contemporary Brazil: from indifference to inequality* (ed. Reichmann, R.) (Pennsylvania State University Press, 1999).
  35. Carneiro, S. *Racismo, Sexismo e desigualdade no Brasil: consciência em debate São Paulo*. (2011).
  36. Arroyo-Kalin, M. Slash-burn-and-churn: Landscape history and crop cultivation in pre-Columbian Amazonia. *Quat. Int.* **249**, 4–18 (2012).
  37. Gomes, D. M. C. O uso social da cerâmica de Parauá, Santarém, baixo Amazonas: uma análise funcional. *Arqueol. Sul-Americana* **4**, 4–33 (2008).
